# Supplementary material for: Concentration dependent chromatin states induced by the bicoid morphogen gradient
Source: eLife journal article supplement (doi:10.7554/elife.28275), 2017-09-11
Supplement: supp [file elife-28275-supp-v1.zip]

Archive with 7 entries (7 files):
- elife_poa_e28275_Figure_2_FIgure_Supplement_1.pdf
- elife_poa_e28275_Supplementary_File_1.xlsx
- elife_poa_e28275_Figure_2_Figure_Supplement_2.pdf
- elife_poa_e28275_Figure_1_Figure_Supplement_1.pdf
- elife_poa_e28275_Figure_6_Figure_Supplement_1.pdf
- elife_poa_e28275_Figure_3_Figure_Supplement_1.pdf
- elife_poa_e28275_Transparent_Reporting_File.pdf
