# Supplementary material for: Concentration dependent chromatin states induced by the bicoid morphogen gradient
Source: eLife journal article supplement (doi:10.7554/elife.28275), 2017-09-11
Supplement: supp [file elife-28275-supp-v1.zip]

### Insensitive

**e-value/  
# of sites**

**TF**

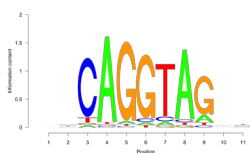

$2.2 \times 10^{-13}$   
289

Zld

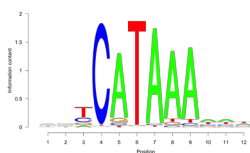

$9.3 \times 10^{-8}$   
273

Cad/  
Abd-B

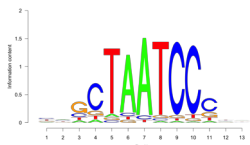

$2.8 \times 10^{-5}$   
194

Bcd

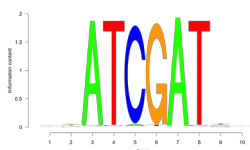

$3.5 \times 10^{-5}$   
146

Dref

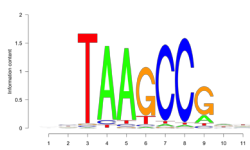

0.01  
140

Bcd

### Sensitive II

**e-value/  
# of sites**

**TF**

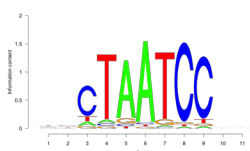

$1.1 \times 10^{-13}$   
444

Bcd

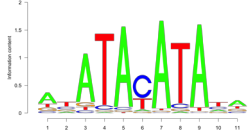

$2.1 \times 10^{-8}$   
310

CF-2/  
fkh

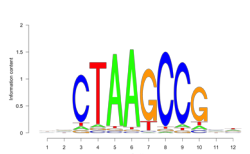

$1.2 \times 10^{-7}$   
123

Bcd

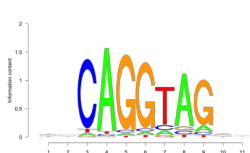

$2.1 \times 10^{-7}$   
281

Zld

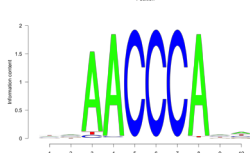

$3.1 \times 10^{-3}$   
93

DI

### Sensitive III

**e-value/  
# of sites**

**TF**

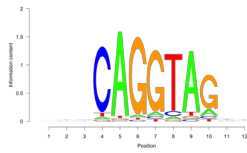

$2.8 \times 10^{-48}$   
1022

Zld

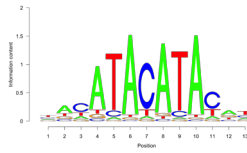

$1.4 \times 10^{-39}$   
919

CF-2/  
fkh

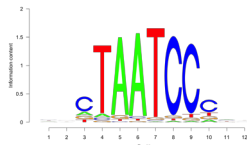

$1.5 \times 10^{-29}$   
624

Bcd

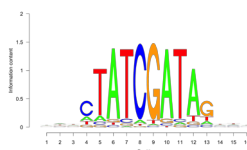

$3.8 \times 10^{-22}$   
450

Dref

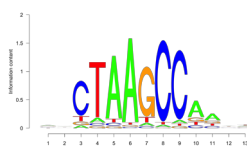

$5 \times 10^{-21}$   
558

Bcd

### Sensitive I

**e-value/  
# of sites**

**TF**

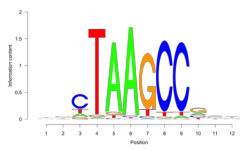

$1.2 \times 10^{-19}$   
243

Bcd

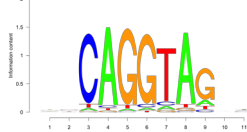

$1 \times 10^{-17}$   
270

Zld

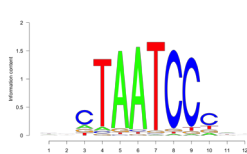

$6.9 \times 10^{-13}$   
354

Bcd

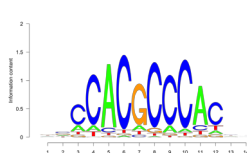

$1.6 \times 10^{-8}$   
157

Hkb/  
Btd

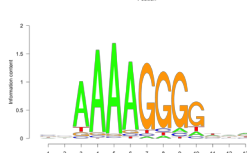

$6.3 \times 10^{-5}$   
201

Kr
