# Supplementary material for: Concentration dependent chromatin states induced by the bicoid morphogen gradient
Source: eLife journal article supplement (doi:10.7554/elife.28275), 2017-09-11
Supplement: supp [file elife-28275-supp-v1.zip › elife_poa_e28275_Supplementary_File_1.xlsx]

## Sheet: Supplemental_File_1.txt
	seqnames	start	end	strand	nearest.mz	bcd.dependent.peaks	zld.dependent.peaks	insensitive	sensitiveIII	sensitiveII	sensitiveI	tileID	HC_ID	zld.bound
1	chr2L	27748	29150	*	l(2)gl	FALSE	TRUE	FALSE	TRUE	FALSE	FALSE	NA	NA	TRUE
2	chr2L	101983	102681	*	CG11377	FALSE	FALSE	FALSE	TRUE	FALSE	FALSE	NA	NA	FALSE
3	chr2L	114462	114954	*	CG11455	FALSE	FALSE	FALSE	TRUE	FALSE	FALSE	NA	NA	FALSE
4	chr2L	278111	279143	*	smo	FALSE	TRUE	FALSE	TRUE	FALSE	FALSE	NA	NA	TRUE
5	chr2L	518040	519671	*	ush	FALSE	TRUE	FALSE	TRUE	FALSE	FALSE	NA	NA	TRUE
6	chr2L	523211	524082	*	ush	FALSE	FALSE	FALSE	TRUE	FALSE	FALSE	NA	NA	TRUE
7	chr2L	589977	590307	*	Gsc	TRUE	FALSE	FALSE	TRUE	FALSE	FALSE	NA	NA	TRUE
8	chr2L	597155	598220	*	Gsc	FALSE	FALSE	FALSE	FALSE	FALSE	TRUE	NA	hc_45	TRUE
9	chr2L	600331	601045	*	CG13689	TRUE	FALSE	FALSE	FALSE	FALSE	TRUE	VT0279	NA	TRUE
10	chr2L	601387	602660	*	CG13689	TRUE	TRUE	FALSE	FALSE	TRUE	FALSE	NA	NA	TRUE
11	chr2L	867428	868575	*	aru	FALSE	FALSE	FALSE	TRUE	FALSE	FALSE	NA	NA	TRUE
12	chr2L	1067791	1069151	*	S	FALSE	TRUE	FALSE	FALSE	TRUE	FALSE	NA	NA	TRUE
13	chr2L	1419580	1420772	*	lea	FALSE	FALSE	FALSE	TRUE	FALSE	FALSE	NA	NA	TRUE
14	chr2L	1485779	1486426	*	CG7420	FALSE	FALSE	FALSE	FALSE	TRUE	FALSE	NA	NA	TRUE
15	chr2L	1507733	1508603	*	CG7420	FALSE	TRUE	FALSE	FALSE	FALSE	TRUE	NA	NA	FALSE
16	chr2L	1954376	1955000	*	erm	FALSE	FALSE	FALSE	TRUE	FALSE	FALSE	NA	NA	TRUE
17	chr2L	1957236	1957950	*	erm	FALSE	FALSE	FALSE	FALSE	TRUE	FALSE	VT0983	NA	FALSE
18	chr2L	1958019	1958826	*	erm	TRUE	FALSE	FALSE	FALSE	TRUE	FALSE	NA	NA	TRUE
19	chr2L	1960844	1961390	*	erm	TRUE	TRUE	FALSE	FALSE	FALSE	TRUE	VT0985	NA	TRUE
20	chr2L	1972550	1973057	*	Der-1	FALSE	FALSE	FALSE	TRUE	FALSE	FALSE	NA	NA	TRUE
21	chr2L	2155297	2156288	*	CG15382	FALSE	TRUE	FALSE	TRUE	FALSE	FALSE	NA	NA	TRUE
22	chr2L	2164487	2165562	*	aop	FALSE	TRUE	FALSE	TRUE	FALSE	FALSE	VT1083	NA	TRUE
23	chr2L	2370305	2370886	*	Axud1	TRUE	FALSE	FALSE	FALSE	FALSE	TRUE	NA	NA	TRUE
24	chr2L	2375564	2376587	*	Atxn7	FALSE	FALSE	FALSE	TRUE	FALSE	FALSE	NA	NA	TRUE
25	chr2L	2380504	2381345	*	Eogt	FALSE	FALSE	FALSE	TRUE	FALSE	FALSE	NA	NA	FALSE
26	chr2L	2456179	2457859	*	dpp	FALSE	TRUE	FALSE	TRUE	FALSE	FALSE	NA	NA	TRUE
27	chr2L	2492285	2493528	*	oaf	FALSE	FALSE	FALSE	TRUE	FALSE	FALSE	NA	NA	FALSE
28	chr2L	2576302	2579559	*	CG3214	FALSE	TRUE	TRUE	FALSE	FALSE	FALSE	NA	hc_21	TRUE
29	chr2L	3071547	3073034	*	toc	FALSE	TRUE	FALSE	FALSE	FALSE	TRUE	NA	NA	TRUE
30	chr2L	3078254	3079126	*	toc	FALSE	TRUE	FALSE	TRUE	FALSE	FALSE	NA	NA	TRUE
31	chr2L	3079748	3080790	*	toc	FALSE	TRUE	FALSE	TRUE	FALSE	FALSE	NA	NA	TRUE
32	chr2L	3144677	3145250	*	CG12400	FALSE	FALSE	FALSE	TRUE	FALSE	FALSE	VT1612	NA	TRUE
33	chr2L	3465520	3466949	*	msl-2	FALSE	TRUE	FALSE	TRUE	FALSE	FALSE	NA	NA	TRUE
34	chr2L	3469781	3470263	*	CG3238	FALSE	FALSE	FALSE	TRUE	FALSE	FALSE	NA	NA	FALSE
35	chr2L	3541770	3542609	*	drm	FALSE	FALSE	FALSE	TRUE	FALSE	FALSE	NA	hc_37	FALSE
36	chr2L	3608317	3608723	*	odd	FALSE	FALSE	FALSE	FALSE	FALSE	TRUE	NA	NA	FALSE
37	chr2L	3610358	3611631	*	odd	FALSE	TRUE	FALSE	FALSE	FALSE	TRUE	NA	NA	TRUE
38	chr2L	3822131	3822651	*	slp1	FALSE	TRUE	FALSE	FALSE	FALSE	TRUE	VT1967	NA	TRUE
39	chr2L	3824560	3825100	*	slp1	FALSE	FALSE	FALSE	FALSE	FALSE	TRUE	NA	NA	TRUE
40	chr2L	3828816	3829725	*	slp1	TRUE	FALSE	FALSE	FALSE	FALSE	TRUE	NA	NA	TRUE
41	chr2L	3833614	3834657	*	slp2	FALSE	TRUE	FALSE	FALSE	FALSE	TRUE	VT1974	hc_2	TRUE
42	chr2L	3860514	3861764	*	CG3964	FALSE	FALSE	FALSE	TRUE	FALSE	FALSE	VT1987	NA	FALSE
43	chr2L	4123216	4124156	*	ed	FALSE	FALSE	FALSE	FALSE	FALSE	TRUE	NA	NA	TRUE
44	chr2L	4366561	4367040	*	Traf4	FALSE	TRUE	FALSE	TRUE	FALSE	FALSE	NA	NA	TRUE
45	chr2L	4367974	4369206	*	Traf4	FALSE	TRUE	FALSE	TRUE	FALSE	FALSE	NA	NA	TRUE
46	chr2L	4594733	4595391	*	dp	FALSE	FALSE	FALSE	TRUE	FALSE	FALSE	NA	NA	TRUE
47	chr2L	4683673	4684854	*	Bsg25A	FALSE	TRUE	TRUE	FALSE	FALSE	FALSE	NA	NA	TRUE
48	chr2L	4687184	4688438	*	Elba3	FALSE	TRUE	FALSE	TRUE	FALSE	FALSE	NA	NA	TRUE
49	chr2L	4823475	4824340	*	CG15628	FALSE	TRUE	FALSE	TRUE	FALSE	FALSE	NA	NA	TRUE
50	chr2L	4837874	4839165	*	CG12194	FALSE	FALSE	FALSE	TRUE	FALSE	FALSE	VT2463	NA	TRUE
51	chr2L	5236851	5238693	*	tkv	FALSE	TRUE	FALSE	TRUE	FALSE	FALSE	NA	NA	TRUE
52	chr2L	5274564	5278038	*	Bsg25D	FALSE	TRUE	TRUE	FALSE	FALSE	FALSE	NA	hc_27	TRUE
53	chr2L	5473742	5474480	*	mid	FALSE	FALSE	TRUE	FALSE	FALSE	FALSE	NA	NA	TRUE
54	chr2L	5564916	5566172	*	CG14014	FALSE	TRUE	FALSE	TRUE	FALSE	FALSE	NA	NA	TRUE
55	chr2L	5805120	5805691	*	CG11034	FALSE	FALSE	FALSE	TRUE	FALSE	FALSE	NA	NA	FALSE
56	chr2L	5983367	5984185	*	eIF-4a	FALSE	TRUE	TRUE	FALSE	FALSE	FALSE	NA	NA	TRUE
57	chr2L	5985910	5986546	*	ifc	FALSE	FALSE	FALSE	FALSE	TRUE	FALSE	NA	NA	TRUE
58	chr2L	6048577	6049651	*	slmo	FALSE	FALSE	FALSE	TRUE	FALSE	FALSE	NA	NA	TRUE
59	chr2L	6372846	6377667	*	slam	FALSE	TRUE	TRUE	FALSE	FALSE	FALSE	NA	NA	TRUE
60	chr2L	6455103	6456522	*	retm	FALSE	FALSE	FALSE	TRUE	FALSE	FALSE	NA	NA	FALSE
61	chr2L	6532051	6532555	*	eya	FALSE	FALSE	FALSE	FALSE	FALSE	TRUE	NA	NA	FALSE
62	chr2L	6535791	6536408	*	eya	FALSE	FALSE	FALSE	TRUE	FALSE	FALSE	NA	NA	TRUE
63	chr2L	6543825	6544327	*	eya	FALSE	FALSE	FALSE	TRUE	FALSE	FALSE	NA	NA	TRUE
64	chr2L	6544638	6545070	*	eya	FALSE	FALSE	FALSE	TRUE	FALSE	FALSE	NA	NA	TRUE
65	chr2L	6724701	6725295	*	Liprin-alpha	FALSE	FALSE	FALSE	FALSE	TRUE	FALSE	NA	NA	TRUE
66	chr2L	6821553	6822095	*	nrv2	FALSE	FALSE	FALSE	TRUE	FALSE	FALSE	NA	NA	FALSE
67	chr2L	6939671	6940154	*	Fgop2	FALSE	FALSE	FALSE	TRUE	FALSE	FALSE	NA	NA	TRUE
68	chr2L	6949660	6950574	*	ihog	TRUE	FALSE	FALSE	FALSE	FALSE	TRUE	NA	NA	TRUE
69	chr2L	7009602	7011446	*	uif	FALSE	FALSE	TRUE	FALSE	FALSE	FALSE	NA	NA	TRUE
70	chr2L	7048502	7049385	*	milt	FALSE	TRUE	TRUE	FALSE	FALSE	FALSE	NA	hc_39	TRUE
71	chr2L	7138097	7138970	*	CG4495	FALSE	TRUE	FALSE	TRUE	FALSE	FALSE	NA	NA	TRUE
72	chr2L	7244891	7245741	*	Ndae1	TRUE	FALSE	FALSE	FALSE	TRUE	FALSE	NA	NA	TRUE
73	chr2L	7246982	7248151	*	Ndae1	FALSE	TRUE	FALSE	FALSE	FALSE	TRUE	NA	NA	TRUE
74	chr2L	7289509	7290674	*	Wnt4	FALSE	FALSE	FALSE	FALSE	TRUE	FALSE	NA	NA	TRUE
75	chr2L	7299433	7300359	*	wg	FALSE	FALSE	FALSE	FALSE	TRUE	FALSE	NA	NA	TRUE
76	chr2L	7303879	7305256	*	wg	FALSE	TRUE	FALSE	FALSE	FALSE	TRUE	NA	NA	TRUE
77	chr2L	7310876	7311409	*	wg	FALSE	FALSE	FALSE	FALSE	FALSE	TRUE	NA	NA	FALSE
78	chr2L	8145098	8145944	*	CG43394	FALSE	TRUE	FALSE	TRUE	FALSE	FALSE	NA	NA	TRUE
79	chr2L	8159530	8160013	*	CG43394	FALSE	FALSE	FALSE	TRUE	FALSE	FALSE	NA	NA	FALSE
80	chr2L	8275795	8276824	*	Btk29A	FALSE	TRUE	FALSE	TRUE	FALSE	FALSE	NA	NA	TRUE
81	chr2L	8387147	8387881	*	CG13384	FALSE	TRUE	FALSE	TRUE	FALSE	FALSE	NA	NA	TRUE
82	chr2L	8413715	8414120	*	Akap200	FALSE	FALSE	FALSE	FALSE	FALSE	TRUE	NA	NA	TRUE
83	chr2L	8477912	8478980	*	d	FALSE	FALSE	FALSE	TRUE	FALSE	FALSE	NA	NA	TRUE
84	chr2L	8528287	8528809	*	lmgA	FALSE	FALSE	TRUE	FALSE	FALSE	FALSE	VT4291	NA	FALSE
85	chr2L	8809380	8810367	*	NA	FALSE	TRUE	FALSE	FALSE	FALSE	TRUE	VT4432	NA	TRUE
86	chr2L	8832163	8832966	*	SoxN	FALSE	TRUE	FALSE	FALSE	TRUE	FALSE	VT4442	NA	TRUE
87	chr2L	8841314	8842400	*	SoxN	FALSE	TRUE	FALSE	TRUE	FALSE	FALSE	NA	NA	TRUE
88	chr2L	9448109	9448569	*	numb	FALSE	TRUE	TRUE	FALSE	FALSE	FALSE	NA	NA	TRUE
89	chr2L	9448965	9450348	*	numb	FALSE	TRUE	FALSE	TRUE	FALSE	FALSE	NA	NA	TRUE
90	chr2L	9520776	9521932	*	Oatp30B	FALSE	FALSE	FALSE	TRUE	FALSE	FALSE	NA	NA	TRUE
91	chr2L	9582884	9583847	*	gcm	FALSE	FALSE	FALSE	FALSE	FALSE	TRUE	NA	NA	TRUE
92	chr2L	9584315	9584724	*	gcm	FALSE	FALSE	FALSE	FALSE	FALSE	TRUE	NA	NA	FALSE
93	chr2L	9970366	9970882	*	RpL13	FALSE	FALSE	FALSE	FALSE	TRUE	FALSE	VT5058	NA	TRUE
94	chr2L	9991402	9991909	*	bib	FALSE	TRUE	FALSE	FALSE	FALSE	TRUE	NA	NA	FALSE
95	chr2L	10260830	10261561	*	Pten	FALSE	FALSE	FALSE	TRUE	FALSE	FALSE	NA	NA	FALSE
96	chr2L	10298304	10298885	*	CYLD	FALSE	FALSE	FALSE	TRUE	FALSE	FALSE	NA	NA	FALSE
97	chr2L	10506551	10507163	*	Myo31DF	FALSE	FALSE	FALSE	FALSE	TRUE	FALSE	NA	NA	FALSE
98	chr2L	10646736	10647115	*	CG31871	FALSE	FALSE	TRUE	FALSE	FALSE	FALSE	NA	NA	FALSE
99	chr2L	10647671	10648518	*	CG31871	FALSE	FALSE	TRUE	FALSE	FALSE	FALSE	NA	NA	FALSE
100	chr2L	11074883	11077029	*	CG14915	FALSE	TRUE	TRUE	FALSE	FALSE	FALSE	NA	hc_9	TRUE
101	chr2L	11452494	11453531	*	salm	FALSE	TRUE	FALSE	TRUE	FALSE	FALSE	NA	NA	TRUE
102	chr2L	11455171	11456227	*	salm	FALSE	TRUE	FALSE	FALSE	TRUE	FALSE	NA	NA	TRUE
103	chr2L	12006860	12007829	*	CG6746	FALSE	FALSE	FALSE	TRUE	FALSE	FALSE	NA	NA	TRUE
104	chr2L	12010125	12012242	*	CG6734	FALSE	FALSE	FALSE	TRUE	FALSE	FALSE	NA	NA	TRUE
105	chr2L	12080846	12081851	*	prd	FALSE	TRUE	FALSE	FALSE	TRUE	FALSE	NA	NA	TRUE
106	chr2L	12087411	12087889	*	prd	FALSE	TRUE	FALSE	TRUE	FALSE	FALSE	NA	NA	TRUE
107	chr2L	12088929	12089821	*	prd	FALSE	TRUE	FALSE	FALSE	FALSE	TRUE	NA	hc_3	TRUE
108	chr2L	12433021	12435136	*	NA	FALSE	FALSE	FALSE	TRUE	FALSE	FALSE	NA	NA	TRUE
109	chr2L	12662636	12663342	*	pdm2	FALSE	TRUE	FALSE	TRUE	FALSE	FALSE	NA	NA	TRUE
110	chr2L	12665976	12666905	*	pdm2	FALSE	TRUE	FALSE	TRUE	FALSE	FALSE	VT6477	NA	TRUE
111	chr2L	12704253	12705259	*	spict	FALSE	FALSE	FALSE	TRUE	FALSE	FALSE	NA	NA	TRUE
112	chr2L	12845887	12846301	*	kek1	FALSE	FALSE	FALSE	FALSE	TRUE	FALSE	NA	NA	FALSE
113	chr2L	13224942	13225936	*	CG15480	FALSE	TRUE	TRUE	FALSE	FALSE	FALSE	NA	NA	TRUE
114	chr2L	13226912	13227941	*	CG16813	FALSE	TRUE	FALSE	TRUE	FALSE	FALSE	NA	hc_5	TRUE
115	chr2L	13229155	13230102	*	CG16815	FALSE	TRUE	TRUE	FALSE	FALSE	FALSE	NA	hc_4	TRUE
116	chr2L	13234422	13235157	*	CG15479	FALSE	TRUE	FALSE	TRUE	FALSE	FALSE	NA	NA	TRUE
117	chr2L	13780467	13781170	*	p38b	FALSE	FALSE	FALSE	TRUE	FALSE	FALSE	NA	NA	FALSE
118	chr2L	13829375	13830007	*	Arpc1	FALSE	FALSE	FALSE	TRUE	FALSE	FALSE	NA	NA	FALSE
119	chr2L	13867564	13868606	*	CenG1A	FALSE	TRUE	FALSE	FALSE	TRUE	FALSE	VT7068	NA	TRUE
120	chr2L	13869210	13869828	*	CenG1A	FALSE	FALSE	FALSE	TRUE	FALSE	FALSE	NA	NA	TRUE
121	chr2L	13887023	13887394	*	CenG1A	TRUE	TRUE	FALSE	FALSE	FALSE	TRUE	VT7079	NA	TRUE
122	chr2L	14429710	14430798	*	noc	FALSE	FALSE	FALSE	FALSE	FALSE	TRUE	NA	NA	TRUE
123	chr2L	14431258	14431779	*	noc	TRUE	FALSE	FALSE	FALSE	TRUE	FALSE	NA	NA	TRUE
124	chr2L	14435756	14436780	*	noc	FALSE	FALSE	FALSE	TRUE	FALSE	FALSE	NA	NA	TRUE
125	chr2L	14445473	14446280	*	noc	FALSE	TRUE	FALSE	TRUE	FALSE	FALSE	NA	NA	TRUE
126	chr2L	14488918	14489868	*	noc	FALSE	TRUE	FALSE	FALSE	FALSE	TRUE	VT7403	hc_34	TRUE
127	chr2L	15039183	15040329	*	Su(H)	FALSE	FALSE	FALSE	TRUE	FALSE	FALSE	VT7687	NA	FALSE
128	chr2L	15057617	15058144	*	ck	FALSE	FALSE	FALSE	TRUE	FALSE	FALSE	NA	NA	FALSE
129	chr2L	15319723	15320357	*	esg	FALSE	TRUE	FALSE	TRUE	FALSE	FALSE	VT7839	NA	TRUE
130	chr2L	15324431	15324882	*	esg	FALSE	TRUE	TRUE	FALSE	FALSE	FALSE	VT7842	NA	TRUE
131	chr2L	15325776	15326460	*	esg	FALSE	TRUE	FALSE	FALSE	FALSE	TRUE	NA	NA	TRUE
132	chr2L	15370204	15370915	*	esg	FALSE	FALSE	FALSE	FALSE	FALSE	TRUE	NA	NA	FALSE
133	chr2L	15479409	15480415	*	sna	FALSE	TRUE	FALSE	TRUE	FALSE	FALSE	VT7922	NA	TRUE
134	chr2L	15733266	15734182	*	CycE	FALSE	TRUE	FALSE	TRUE	FALSE	FALSE	NA	NA	TRUE
135	chr2L	15742524	15743524	*	CycE	FALSE	TRUE	FALSE	TRUE	FALSE	FALSE	NA	NA	TRUE
136	chr2L	15768102	15768456	*	wek	FALSE	FALSE	TRUE	FALSE	FALSE	FALSE	NA	NA	FALSE
137	chr2L	15908086	15908552	*	Ku80	TRUE	FALSE	FALSE	TRUE	FALSE	FALSE	NA	NA	FALSE
138	chr2L	15973665	15974600	*	beat-Ia	FALSE	TRUE	FALSE	TRUE	FALSE	FALSE	NA	hc_57	TRUE
139	chr2L	16257151	16258502	*	PRL-1	FALSE	FALSE	FALSE	TRUE	FALSE	FALSE	NA	NA	TRUE
140	chr2L	16306932	16307457	*	CG5861	FALSE	FALSE	FALSE	TRUE	FALSE	FALSE	NA	NA	FALSE
141	chr2L	16329018	16331286	*	cact	FALSE	TRUE	FALSE	TRUE	FALSE	FALSE	NA	NA	TRUE
142	chr2L	16353584	16354251	*	CG4455	FALSE	TRUE	TRUE	FALSE	FALSE	FALSE	NA	NA	TRUE
143	chr2L	17262148	17263041	*	beat-IIIc	FALSE	TRUE	FALSE	TRUE	FALSE	FALSE	NA	NA	TRUE
144	chr2L	17740330	17740900	*	CadN	FALSE	TRUE	TRUE	FALSE	FALSE	FALSE	VT9076	NA	TRUE
145	chr2L	17743490	17744310	*	CadN	FALSE	TRUE	FALSE	FALSE	FALSE	TRUE	NA	NA	TRUE
146	chr2L	18110647	18111782	*	kel	TRUE	TRUE	FALSE	FALSE	FALSE	TRUE	NA	NA	TRUE
147	chr2L	18369272	18370056	*	Fas3	TRUE	TRUE	FALSE	FALSE	TRUE	FALSE	NA	NA	TRUE
148	chr2L	18370654	18371119	*	Fas3	TRUE	TRUE	FALSE	TRUE	FALSE	FALSE	NA	NA	TRUE
149	chr2L	18597793	18598732	*	amos	FALSE	TRUE	FALSE	FALSE	TRUE	FALSE	NA	hc_28	TRUE
150	chr2L	18778332	18779525	*	ham	FALSE	FALSE	FALSE	TRUE	FALSE	FALSE	NA	hc_44	TRUE
151	chr2L	18782626	18783549	*	ham	FALSE	FALSE	FALSE	TRUE	FALSE	FALSE	NA	NA	TRUE
152	chr2L	18830452	18831532	*	ScpX	FALSE	FALSE	FALSE	TRUE	FALSE	FALSE	NA	NA	FALSE
153	chr2L	18859059	18859530	*	tup	FALSE	FALSE	TRUE	FALSE	FALSE	FALSE	NA	NA	FALSE
154	chr2L	18880613	18881689	*	tup	TRUE	FALSE	FALSE	FALSE	TRUE	FALSE	VT9669	hc_43	TRUE
155	chr2L	18894780	18895918	*	tup	FALSE	TRUE	FALSE	TRUE	FALSE	FALSE	VT9677	NA	TRUE
156	chr2L	18897651	18898057	*	tup	FALSE	TRUE	FALSE	TRUE	FALSE	FALSE	VT9679	NA	TRUE
157	chr2L	19154676	19155661	*	brat	FALSE	TRUE	FALSE	TRUE	FALSE	FALSE	NA	NA	TRUE
158	chr2L	19219627	19220931	*	drl	FALSE	FALSE	TRUE	FALSE	FALSE	FALSE	VT9846	NA	TRUE
159	chr2L	19326715	19327491	*	dnt	FALSE	TRUE	FALSE	TRUE	FALSE	FALSE	NA	NA	TRUE
160	chr2L	19329513	19329988	*	dnt	FALSE	FALSE	FALSE	FALSE	FALSE	TRUE	NA	NA	FALSE
161	chr2L	19333712	19334401	*	dnt	FALSE	TRUE	FALSE	TRUE	FALSE	FALSE	NA	NA	TRUE
162	chr2L	19337570	19338854	*	dnt	FALSE	TRUE	FALSE	TRUE	FALSE	FALSE	NA	NA	TRUE
163	chr2L	19341147	19341783	*	dnt	FALSE	TRUE	FALSE	TRUE	FALSE	FALSE	NA	NA	TRUE
164	chr2L	19358475	19359236	*	dnt	FALSE	FALSE	TRUE	FALSE	FALSE	FALSE	NA	NA	TRUE
165	chr2L	19363531	19364013	*	dnt	FALSE	FALSE	FALSE	TRUE	FALSE	FALSE	NA	NA	FALSE
166	chr2L	19452716	19453847	*	Top2	FALSE	FALSE	FALSE	TRUE	FALSE	FALSE	NA	NA	TRUE
167	chr2L	19508357	19509152	*	CG10188	FALSE	FALSE	FALSE	TRUE	FALSE	FALSE	NA	NA	FALSE
168	chr2L	19542102	19543016	*	ref(2)P	FALSE	FALSE	FALSE	TRUE	FALSE	FALSE	NA	NA	TRUE
169	chr2L	19815802	19817591	*	sick	FALSE	TRUE	FALSE	TRUE	FALSE	FALSE	NA	NA	TRUE
170	chr2L	19937850	19938487	*	sick	FALSE	TRUE	FALSE	TRUE	FALSE	FALSE	NA	NA	TRUE
171	chr2L	20062372	20063355	*	lok	TRUE	TRUE	FALSE	FALSE	TRUE	FALSE	NA	NA	TRUE
172	chr2L	20684492	20684960	*	CG2617	FALSE	FALSE	FALSE	FALSE	FALSE	TRUE	NA	NA	TRUE
173	chr2L	20768236	20769477	*	dia	FALSE	TRUE	TRUE	FALSE	FALSE	FALSE	VT10589	NA	TRUE
174	chr2L	20825189	20825706	*	CG9328	TRUE	FALSE	FALSE	FALSE	TRUE	FALSE	NA	NA	FALSE
175	chr2L	21136816	21137191	*	Nhe2	FALSE	FALSE	FALSE	FALSE	FALSE	TRUE	NA	NA	FALSE
176	chr2L	21190556	21191345	*	bur	TRUE	TRUE	FALSE	FALSE	TRUE	FALSE	NA	NA	TRUE
177	chr2L	21556706	21557541	*	His-Psi:CR31614	FALSE	FALSE	FALSE	TRUE	FALSE	FALSE	NA	NA	FALSE
178	chr2L	21572922	21574172	*	Lamp1	FALSE	FALSE	FALSE	TRUE	FALSE	FALSE	NA	NA	FALSE
179	chr2L	21707950	21708735	*	CG31619	FALSE	FALSE	FALSE	TRUE	FALSE	FALSE	NA	NA	FALSE
180	chr2L	21741343	21742181	*	step	TRUE	FALSE	FALSE	FALSE	TRUE	FALSE	NA	hc_17	TRUE
181	chr2L	21765796	21766388	*	CG31612	TRUE	FALSE	FALSE	FALSE	FALSE	TRUE	NA	hc_17	TRUE
182	chr2L	21876824	21877758	*	tsh	FALSE	TRUE	TRUE	FALSE	FALSE	FALSE	VT11163	NA	TRUE
183	chr2L	21901475	21902103	*	tsh	FALSE	FALSE	FALSE	TRUE	FALSE	FALSE	NA	NA	TRUE
184	chr2L	22151310	22153506	*	CG34137	FALSE	TRUE	TRUE	FALSE	FALSE	FALSE	NA	NA	TRUE
185	chr2L	22429141	22429841	*	RpL5	FALSE	FALSE	FALSE	TRUE	FALSE	FALSE	NA	NA	FALSE
186	chr2L	22639332	22639769	*	NA	TRUE	FALSE	FALSE	TRUE	FALSE	FALSE	NA	NA	TRUE
187	chr2R	403193	404232	*	Gprk1	FALSE	FALSE	FALSE	TRUE	FALSE	FALSE	NA	NA	FALSE
188	chr2R	406033	406693	*	Gprk1	TRUE	FALSE	FALSE	TRUE	FALSE	FALSE	NA	NA	FALSE
189	chr2R	711404	712581	*	CG17528	FALSE	FALSE	FALSE	TRUE	FALSE	FALSE	NA	NA	FALSE
190	chr2R	942805	943228	*	gus	FALSE	TRUE	TRUE	FALSE	FALSE	FALSE	NA	NA	FALSE
191	chr2R	1550271	1551005	*	Not3	FALSE	FALSE	FALSE	TRUE	FALSE	FALSE	NA	NA	TRUE
192	chr2R	1565092	1565483	*	kune	FALSE	FALSE	FALSE	FALSE	TRUE	FALSE	NA	NA	FALSE
193	chr2R	1586644	1587116	*	CG17337	FALSE	FALSE	FALSE	TRUE	FALSE	FALSE	VT12225	NA	FALSE
194	chr2R	1589171	1589880	*	vlc	FALSE	FALSE	FALSE	TRUE	FALSE	FALSE	VT12227	NA	FALSE
195	chr2R	1824719	1826533	*	BubR1	FALSE	TRUE	FALSE	FALSE	FALSE	TRUE	NA	NA	TRUE
196	chr2R	1855105	1855619	*	BubR1	FALSE	FALSE	FALSE	TRUE	FALSE	FALSE	NA	NA	FALSE
197	chr2R	1894027	1894352	*	NA	FALSE	FALSE	FALSE	TRUE	FALSE	FALSE	NA	NA	TRUE
198	chr2R	2103808	2104171	*	bin3	FALSE	FALSE	TRUE	FALSE	FALSE	FALSE	NA	NA	FALSE
199	chr2R	2415082	2415947	*	jing	TRUE	TRUE	FALSE	TRUE	FALSE	FALSE	NA	NA	TRUE
200	chr2R	2460549	2461771	*	jing	FALSE	TRUE	FALSE	TRUE	FALSE	FALSE	NA	hc_30	TRUE
201	chr2R	2463358	2464013	*	jing	TRUE	FALSE	FALSE	FALSE	TRUE	FALSE	NA	hc_31	TRUE
202	chr2R	2473164	2473965	*	jing	TRUE	TRUE	FALSE	FALSE	TRUE	FALSE	NA	NA	TRUE
203	chr2R	2487889	2488540	*	CG15233	FALSE	TRUE	FALSE	FALSE	FALSE	TRUE	VT12595	NA	TRUE
204	chr2R	2497855	2498701	*	jing	FALSE	FALSE	FALSE	TRUE	FALSE	FALSE	VT12601	NA	TRUE
205	chr2R	2506092	2506833	*	jing	TRUE	TRUE	FALSE	FALSE	FALSE	TRUE	VT12603	NA	TRUE
206	chr2R	2562958	2563512	*	CG17266	FALSE	FALSE	FALSE	TRUE	FALSE	FALSE	VT12630	NA	FALSE
207	chr2R	2571066	2571984	*	CG9422	FALSE	TRUE	FALSE	FALSE	TRUE	FALSE	NA	NA	TRUE
208	chr2R	2697525	2698801	*	NA	FALSE	TRUE	FALSE	TRUE	FALSE	FALSE	NA	NA	FALSE
209	chr2R	2872871	2873730	*	vimar	FALSE	FALSE	FALSE	TRUE	FALSE	FALSE	NA	NA	FALSE
210	chr2R	3267892	3269650	*	Dscam1	FALSE	FALSE	FALSE	TRUE	FALSE	FALSE	NA	NA	TRUE
211	chr2R	3305931	3306423	*	so	FALSE	FALSE	FALSE	TRUE	FALSE	FALSE	NA	NA	TRUE
212	chr2R	3326707	3327322	*	so	FALSE	TRUE	FALSE	TRUE	FALSE	FALSE	NA	NA	TRUE
213	chr2R	3354090	3354481	*	Aldh-III	FALSE	FALSE	TRUE	FALSE	FALSE	FALSE	NA	NA	TRUE
214	chr2R	3361538	3361989	*	Aldh-III	FALSE	FALSE	FALSE	TRUE	FALSE	FALSE	NA	NA	FALSE
215	chr2R	3486931	3487633	*	scra	FALSE	TRUE	FALSE	TRUE	FALSE	FALSE	VT13120	NA	TRUE
216	chr2R	3803904	3804721	*	Cul1	FALSE	FALSE	FALSE	TRUE	FALSE	FALSE	NA	NA	FALSE
217	chr2R	3835237	3835798	*	CG2915	FALSE	FALSE	FALSE	FALSE	FALSE	TRUE	NA	NA	TRUE
218	chr2R	3846823	3847683	*	2017-09-05	FALSE	TRUE	FALSE	TRUE	FALSE	FALSE	NA	NA	TRUE
219	chr2R	3934037	3934587	*	Optix	FALSE	FALSE	FALSE	TRUE	FALSE	FALSE	VT13348	hc_53	FALSE
220	chr2R	3937414	3937957	*	Optix	FALSE	FALSE	FALSE	TRUE	FALSE	FALSE	VT13350	NA	FALSE
221	chr2R	4016895	4018054	*	Pbp49	FALSE	TRUE	FALSE	TRUE	FALSE	FALSE	NA	NA	TRUE
222	chr2R	4119368	4120328	*	dpn	FALSE	FALSE	FALSE	TRUE	FALSE	FALSE	VT13448	NA	TRUE
223	chr2R	4120766	4121608	*	dpn	FALSE	TRUE	FALSE	TRUE	FALSE	FALSE	NA	NA	TRUE
224	chr2R	4133498	4134263	*	pnut	FALSE	TRUE	FALSE	TRUE	FALSE	FALSE	NA	NA	TRUE
225	chr2R	4135435	4136206	*	pnut	FALSE	TRUE	TRUE	FALSE	FALSE	FALSE	NA	NA	TRUE
226	chr2R	4528231	4529238	*	ptc	TRUE	FALSE	FALSE	FALSE	TRUE	FALSE	NA	NA	TRUE
227	chr2R	4530608	4531325	*	ptc	TRUE	FALSE	FALSE	FALSE	TRUE	FALSE	VT13665	NA	TRUE
228	chr2R	4542140	4542900	*	ptc	FALSE	TRUE	FALSE	FALSE	FALSE	TRUE	NA	NA	TRUE
229	chr2R	4545100	4546295	*	ptc	FALSE	TRUE	TRUE	FALSE	FALSE	FALSE	VT13673	NA	TRUE
230	chr2R	4610624	4612528	*	CG14767	FALSE	FALSE	FALSE	TRUE	FALSE	FALSE	NA	NA	FALSE
231	chr2R	4753764	4754156	*	sns	FALSE	FALSE	FALSE	TRUE	FALSE	FALSE	NA	NA	FALSE
232	chr2R	4787318	4787948	*	MrgBP	FALSE	FALSE	FALSE	TRUE	FALSE	FALSE	NA	NA	FALSE
233	chr2R	4926959	4927272	*	Dbp45A	FALSE	FALSE	FALSE	TRUE	FALSE	FALSE	NA	NA	FALSE
234	chr2R	4942945	4943524	*	Dbp45A	TRUE	TRUE	FALSE	FALSE	FALSE	TRUE	VT13877	NA	TRUE
235	chr2R	5070325	5070900	*	CG8026	FALSE	FALSE	FALSE	TRUE	FALSE	FALSE	NA	NA	FALSE
236	chr2R	5333095	5333817	*	ced-6	FALSE	FALSE	TRUE	FALSE	FALSE	FALSE	NA	NA	FALSE
237	chr2R	5860819	5861158	*	CG12134	FALSE	FALSE	FALSE	FALSE	FALSE	TRUE	NA	NA	TRUE
238	chr2R	5864381	5866047	*	eve	FALSE	TRUE	FALSE	FALSE	TRUE	FALSE	VT14362	NA	TRUE
239	chr2R	5872245	5872790	*	TER94	FALSE	FALSE	TRUE	FALSE	FALSE	FALSE	NA	NA	TRUE
240	chr2R	5873194	5874339	*	TER94	TRUE	FALSE	FALSE	FALSE	FALSE	TRUE	NA	NA	TRUE
241	chr2R	5876437	5876730	*	TER94	FALSE	FALSE	FALSE	TRUE	FALSE	FALSE	NA	NA	FALSE
242	chr2R	5964462	5965322	*	egr	FALSE	TRUE	FALSE	TRUE	FALSE	FALSE	NA	NA	TRUE
243	chr2R	6423181	6424103	*	lola	FALSE	FALSE	FALSE	TRUE	FALSE	FALSE	NA	NA	TRUE
244	chr2R	6470520	6472434	*	psq	FALSE	FALSE	FALSE	TRUE	FALSE	FALSE	NA	NA	TRUE
245	chr2R	6692539	6693170	*	wde	FALSE	FALSE	FALSE	TRUE	FALSE	FALSE	NA	NA	TRUE
246	chr2R	6707135	6707668	*	dgo	FALSE	FALSE	FALSE	TRUE	FALSE	FALSE	NA	NA	TRUE
247	chr2R	6773929	6774705	*	CG30020	FALSE	FALSE	FALSE	TRUE	FALSE	FALSE	NA	NA	FALSE
248	chr2R	7078724	7079722	*	shn	FALSE	TRUE	FALSE	TRUE	FALSE	FALSE	NA	NA	TRUE
249	chr2R	7085611	7087288	*	shn	FALSE	TRUE	FALSE	TRUE	FALSE	FALSE	NA	NA	TRUE
250	chr2R	7124800	7125643	*	metro	FALSE	TRUE	TRUE	FALSE	FALSE	FALSE	NA	NA	TRUE
251	chr2R	7342722	7343752	*	E(Pc)	FALSE	TRUE	FALSE	TRUE	FALSE	FALSE	NA	NA	TRUE
252	chr2R	7362824	7363492	*	inv	FALSE	FALSE	FALSE	TRUE	FALSE	FALSE	NA	NA	TRUE
253	chr2R	7419513	7420196	*	en	FALSE	FALSE	FALSE	TRUE	FALSE	FALSE	VT15159	NA	TRUE
254	chr2R	7491711	7492228	*	tou	FALSE	FALSE	FALSE	TRUE	FALSE	FALSE	NA	NA	TRUE
255	chr2R	7503161	7504326	*	tou	FALSE	FALSE	FALSE	FALSE	TRUE	FALSE	NA	NA	TRUE
256	chr2R	7681501	7683879	*	ths	FALSE	TRUE	FALSE	TRUE	FALSE	FALSE	NA	NA	TRUE
257	chr2R	7872524	7873583	*	RnrS	FALSE	FALSE	FALSE	TRUE	FALSE	FALSE	NA	NA	TRUE
258	chr2R	7876153	7876855	*	rho-7	FALSE	FALSE	FALSE	TRUE	FALSE	FALSE	NA	NA	FALSE
259	chr2R	7904917	7905662	*	otk	TRUE	FALSE	FALSE	FALSE	TRUE	FALSE	NA	NA	TRUE
260	chr2R	7914198	7915799	*	Mppe	FALSE	FALSE	FALSE	FALSE	TRUE	FALSE	NA	hc_12	TRUE
261	chr2R	8095999	8097217	*	Sr-CII	FALSE	TRUE	FALSE	TRUE	FALSE	FALSE	NA	NA	TRUE
262	chr2R	8342173	8343236	*	Lac	FALSE	TRUE	FALSE	TRUE	FALSE	FALSE	NA	NA	TRUE
263	chr2R	8345571	8346178	*	Lac	FALSE	TRUE	FALSE	TRUE	FALSE	FALSE	NA	NA	FALSE
264	chr2R	8417999	8419054	*	fra	FALSE	TRUE	FALSE	TRUE	FALSE	FALSE	NA	NA	TRUE
265	chr2R	8523254	8524416	*	CG33671	FALSE	FALSE	FALSE	TRUE	FALSE	FALSE	NA	NA	FALSE
266	chr2R	8638291	8638836	*	CG42663	FALSE	FALSE	FALSE	TRUE	FALSE	FALSE	NA	NA	FALSE
267	chr2R	8648064	8648527	*	Nacalpha	FALSE	FALSE	TRUE	FALSE	FALSE	FALSE	NA	NA	FALSE
268	chr2R	8667349	8669128	*	sca	FALSE	TRUE	FALSE	TRUE	FALSE	FALSE	VT15828	NA	TRUE
269	chr2R	8673756	8674052	*	sca	FALSE	FALSE	FALSE	TRUE	FALSE	FALSE	VT15830	NA	FALSE
270	chr2R	8803156	8803720	*	NAT1	FALSE	FALSE	TRUE	FALSE	FALSE	FALSE	NA	NA	FALSE
271	chr2R	8833540	8834467	*	Mdr49	FALSE	FALSE	FALSE	TRUE	FALSE	FALSE	NA	NA	TRUE
272	chr2R	8835228	8835746	*	Mdr49	FALSE	FALSE	FALSE	TRUE	FALSE	FALSE	NA	NA	TRUE
273	chr2R	8883364	8884420	*	NA	FALSE	FALSE	FALSE	TRUE	FALSE	FALSE	NA	NA	TRUE
274	chr2R	9077372	9078464	*	Kdm4B	TRUE	FALSE	FALSE	FALSE	TRUE	FALSE	NA	NA	TRUE
275	chr2R	9448630	9450091	*	link	FALSE	TRUE	FALSE	TRUE	FALSE	FALSE	NA	hc_29	TRUE
276	chr2R	9450330	9452353	*	link	FALSE	TRUE	TRUE	FALSE	FALSE	FALSE	NA	NA	TRUE
277	chr2R	9453999	9455081	*	link	FALSE	TRUE	FALSE	TRUE	FALSE	FALSE	NA	NA	TRUE
278	chr2R	9455182	9455690	*	link	FALSE	TRUE	FALSE	TRUE	FALSE	FALSE	NA	NA	TRUE
279	chr2R	9456655	9457727	*	CG6191	FALSE	TRUE	FALSE	TRUE	FALSE	FALSE	NA	NA	TRUE
280	chr2R	9467415	9467856	*	CG6191	FALSE	FALSE	FALSE	FALSE	TRUE	FALSE	VT16238	NA	TRUE
281	chr2R	9746071	9746916	*	tum	FALSE	FALSE	FALSE	TRUE	FALSE	FALSE	NA	NA	FALSE
282	chr2R	10198870	10199537	*	Shroom	FALSE	TRUE	FALSE	TRUE	FALSE	FALSE	NA	NA	TRUE
283	chr2R	10318072	10320048	*	phyl	FALSE	TRUE	FALSE	TRUE	FALSE	FALSE	NA	NA	TRUE
284	chr2R	10341275	10341917	*	Oaz	TRUE	TRUE	FALSE	FALSE	FALSE	TRUE	NA	NA	TRUE
285	chr2R	10507556	10509686	*	Uhg5	TRUE	FALSE	FALSE	FALSE	FALSE	TRUE	NA	NA	TRUE
286	chr2R	10639532	10640324	*	Rpn6	FALSE	FALSE	FALSE	TRUE	FALSE	FALSE	NA	NA	FALSE
287	chr2R	10687476	10688186	*	kn	FALSE	FALSE	FALSE	FALSE	TRUE	FALSE	VT16851	NA	TRUE
288	chr2R	10869230	10870444	*	pcs	FALSE	TRUE	TRUE	FALSE	FALSE	FALSE	NA	NA	TRUE
289	chr2R	11209419	11210407	*	Arf51F	FALSE	FALSE	FALSE	TRUE	FALSE	FALSE	NA	NA	TRUE
290	chr2R	11239567	11240475	*	unc-5	FALSE	TRUE	FALSE	FALSE	TRUE	FALSE	VT17121	NA	TRUE
291	chr2R	11682685	11683270	*	NA	FALSE	FALSE	FALSE	FALSE	FALSE	TRUE	NA	NA	TRUE
292	chr2R	11735444	11735803	*	Rif1	FALSE	FALSE	FALSE	TRUE	FALSE	FALSE	NA	NA	TRUE
293	chr2R	11739601	11739942	*	Rif1	FALSE	FALSE	FALSE	FALSE	FALSE	TRUE	NA	NA	TRUE
294	chr2R	11753502	11754179	*	Rif1	FALSE	TRUE	FALSE	TRUE	FALSE	FALSE	NA	NA	TRUE
295	chr2R	11785208	11786023	*	sli	FALSE	TRUE	FALSE	TRUE	FALSE	FALSE	VT17409	NA	TRUE
296	chr2R	11809485	11810285	*	sli	FALSE	FALSE	FALSE	TRUE	FALSE	FALSE	VT17422	NA	FALSE
297	chr2R	11819166	11820015	*	bdg	FALSE	FALSE	FALSE	TRUE	FALSE	FALSE	NA	NA	FALSE
298	chr2R	12042693	12043528	*	lbk	FALSE	FALSE	TRUE	FALSE	FALSE	FALSE	NA	NA	TRUE
299	chr2R	12404301	12405132	*	Sema-2a	FALSE	FALSE	FALSE	TRUE	FALSE	FALSE	NA	NA	TRUE
300	chr2R	12458456	12458858	*	RpS15	FALSE	FALSE	FALSE	TRUE	FALSE	FALSE	NA	NA	FALSE
301	chr2R	12715946	12716828	*	CR43650	FALSE	FALSE	FALSE	TRUE	FALSE	FALSE	NA	NA	TRUE
302	chr2R	12737744	12738386	*	IntS8	FALSE	FALSE	FALSE	TRUE	FALSE	FALSE	NA	NA	FALSE
303	chr2R	12838138	12839112	*	mute	FALSE	TRUE	FALSE	TRUE	FALSE	FALSE	NA	NA	TRUE
304	chr2R	12928266	12929027	*	RhoGEF2	FALSE	FALSE	TRUE	FALSE	FALSE	FALSE	NA	NA	FALSE
305	chr2R	13030320	13031098	*	GstS1	FALSE	FALSE	TRUE	FALSE	FALSE	FALSE	NA	NA	FALSE
306	chr2R	13033218	13033928	*	GstS1	FALSE	FALSE	FALSE	FALSE	TRUE	FALSE	NA	NA	FALSE
307	chr2R	13690529	13691285	*	grh	FALSE	TRUE	FALSE	TRUE	FALSE	FALSE	VT18404	NA	TRUE
308	chr2R	13980672	13981954	*	CG5098	FALSE	FALSE	FALSE	FALSE	TRUE	FALSE	NA	NA	TRUE
309	chr2R	14024620	14025246	*	Pcl	TRUE	FALSE	FALSE	FALSE	TRUE	FALSE	NA	NA	FALSE
310	chr2R	14562708	14563295	*	edl	FALSE	FALSE	FALSE	TRUE	FALSE	FALSE	NA	NA	TRUE
311	chr2R	14674611	14675303	*	MFS15	FALSE	FALSE	FALSE	TRUE	FALSE	FALSE	NA	NA	TRUE
312	chr2R	14687058	14687711	*	l(2)08717	FALSE	TRUE	FALSE	TRUE	FALSE	FALSE	NA	NA	TRUE
313	chr2R	15160239	15161418	*	rib	FALSE	FALSE	FALSE	TRUE	FALSE	FALSE	NA	hc_11	TRUE
314	chr2R	15336063	15336499	*	betaTub56D	FALSE	FALSE	FALSE	TRUE	FALSE	FALSE	NA	NA	FALSE
315	chr2R	15546157	15549891	*	hrg	FALSE	FALSE	TRUE	FALSE	FALSE	FALSE	NA	NA	TRUE
316	chr2R	15557270	15557837	*	hrg	FALSE	TRUE	FALSE	TRUE	FALSE	FALSE	NA	NA	TRUE
317	chr2R	15574002	15574627	*	CG15128	FALSE	TRUE	FALSE	FALSE	TRUE	FALSE	NA	NA	TRUE
318	chr2R	15745314	15745840	*	CG8654	FALSE	TRUE	FALSE	TRUE	FALSE	FALSE	NA	NA	TRUE
319	chr2R	15817940	15818495	*	CG8654	FALSE	FALSE	FALSE	FALSE	TRUE	FALSE	NA	NA	TRUE
320	chr2R	15865908	15867178	*	CG8654	FALSE	TRUE	FALSE	FALSE	TRUE	FALSE	NA	hc_61	TRUE
321	chr2R	15928377	15929199	*	CG8654	FALSE	TRUE	FALSE	TRUE	FALSE	FALSE	NA	NA	TRUE
322	chr2R	15953786	15954529	*	18w	FALSE	TRUE	FALSE	TRUE	FALSE	FALSE	NA	NA	TRUE
323	chr2R	15959551	15960687	*	18w	FALSE	TRUE	FALSE	TRUE	FALSE	FALSE	NA	NA	TRUE
324	chr2R	15993578	15994567	*	18w	FALSE	FALSE	FALSE	TRUE	FALSE	FALSE	NA	NA	TRUE
325	chr2R	16131560	16133245	*	CG11208	TRUE	TRUE	FALSE	TRUE	FALSE	FALSE	NA	NA	TRUE
326	chr2R	16198858	16199555	*	CG13868	FALSE	TRUE	FALSE	FALSE	FALSE	TRUE	NA	NA	TRUE
327	chr2R	16207083	16207643	*	CG13868	TRUE	TRUE	FALSE	FALSE	FALSE	TRUE	NA	NA	TRUE
328	chr2R	16214676	16216232	*	CG8929	FALSE	TRUE	FALSE	TRUE	FALSE	FALSE	NA	NA	TRUE
329	chr2R	16425478	16427200	*	Mgat1	FALSE	TRUE	FALSE	TRUE	FALSE	FALSE	NA	NA	TRUE
330	chr2R	16485137	16485843	*	NA	TRUE	FALSE	FALSE	FALSE	FALSE	TRUE	NA	NA	TRUE
331	chr2R	16488212	16488658	*	NA	FALSE	TRUE	FALSE	TRUE	FALSE	FALSE	NA	NA	TRUE
332	chr2R	16558314	16559025	*	CG30152	FALSE	FALSE	FALSE	TRUE	FALSE	FALSE	NA	NA	FALSE
333	chr2R	16746360	16747705	*	insc	TRUE	TRUE	FALSE	FALSE	FALSE	TRUE	NA	NA	TRUE
334	chr2R	16794608	16795545	*	hbn	TRUE	FALSE	FALSE	TRUE	FALSE	FALSE	NA	NA	TRUE
335	chr2R	16848205	16849398	*	hbn	FALSE	TRUE	FALSE	TRUE	FALSE	FALSE	NA	hc_14	TRUE
336	chr2R	16849588	16850408	*	hbn	TRUE	FALSE	FALSE	TRUE	FALSE	FALSE	VT20035	hc_14	TRUE
337	chr2R	16935301	16936282	*	shg	FALSE	TRUE	TRUE	FALSE	FALSE	FALSE	NA	NA	TRUE
338	chr2R	17015714	17016339	*	CG4050	FALSE	FALSE	FALSE	TRUE	FALSE	FALSE	NA	NA	FALSE
339	chr2R	17047709	17049171	*	CG30389	FALSE	FALSE	FALSE	TRUE	FALSE	FALSE	NA	NA	FALSE
340	chr2R	17080213	17081499	*	Lapsyn	FALSE	TRUE	FALSE	TRUE	FALSE	FALSE	NA	NA	TRUE
341	chr2R	17246788	17247444	*	cv-2	FALSE	TRUE	FALSE	FALSE	TRUE	FALSE	NA	NA	TRUE
342	chr2R	17251345	17252329	*	cv-2	FALSE	TRUE	FALSE	TRUE	FALSE	FALSE	NA	NA	TRUE
343	chr2R	17254472	17255650	*	cv-2	FALSE	TRUE	FALSE	TRUE	FALSE	FALSE	NA	NA	TRUE
344	chr2R	17389278	17390422	*	MESK2	FALSE	FALSE	FALSE	TRUE	FALSE	FALSE	NA	NA	FALSE
345	chr2R	17787564	17788049	*	Fili	FALSE	FALSE	FALSE	TRUE	FALSE	FALSE	NA	NA	TRUE
346	chr2R	18157873	18158787	*	dve	FALSE	FALSE	FALSE	TRUE	FALSE	FALSE	VT20735	NA	TRUE
347	chr2R	18262267	18262839	*	Rtf1	FALSE	FALSE	TRUE	FALSE	FALSE	FALSE	NA	NA	FALSE
348	chr2R	18394282	18395696	*	px	TRUE	TRUE	FALSE	FALSE	FALSE	TRUE	NA	NA	TRUE
349	chr2R	18400111	18400930	*	px	FALSE	FALSE	FALSE	TRUE	FALSE	FALSE	NA	NA	TRUE
350	chr2R	18448066	18449676	*	px	FALSE	FALSE	FALSE	FALSE	FALSE	TRUE	NA	NA	TRUE
351	chr2R	18577009	18578842	*	Ppa	FALSE	TRUE	FALSE	TRUE	FALSE	FALSE	VT20956	NA	TRUE
352	chr2R	18585031	18585624	*	robo	TRUE	TRUE	FALSE	TRUE	FALSE	FALSE	VT20957	NA	TRUE
353	chr2R	18689507	18691019	*	blw	FALSE	TRUE	FALSE	TRUE	FALSE	FALSE	VT21015	NA	TRUE
354	chr2R	18741680	18742069	*	RpL23	FALSE	FALSE	TRUE	FALSE	FALSE	FALSE	NA	NA	FALSE
355	chr2R	18776140	18776699	*	MED23	FALSE	FALSE	FALSE	TRUE	FALSE	FALSE	NA	NA	TRUE
356	chr2R	18932306	18933301	*	twi	FALSE	TRUE	FALSE	TRUE	FALSE	FALSE	NA	NA	TRUE
357	chr2R	19093482	19094997	*	CG34371	FALSE	TRUE	FALSE	TRUE	FALSE	FALSE	NA	NA	TRUE
358	chr2R	19233664	19234247	*	CG3502	TRUE	FALSE	FALSE	FALSE	FALSE	TRUE	NA	hc_52	TRUE
359	chr2R	19303610	19304083	*	CG30411	TRUE	TRUE	FALSE	FALSE	FALSE	TRUE	NA	NA	TRUE
360	chr2R	19431336	19431870	*	CG30185	FALSE	FALSE	FALSE	TRUE	FALSE	FALSE	NA	NA	TRUE
361	chr2R	19467285	19467836	*	apt	TRUE	TRUE	FALSE	TRUE	FALSE	FALSE	NA	NA	FALSE
362	chr2R	19526489	19527177	*	NA	FALSE	FALSE	FALSE	TRUE	FALSE	FALSE	NA	NA	TRUE
363	chr2R	19532695	19534026	*	NA	FALSE	TRUE	FALSE	TRUE	FALSE	FALSE	NA	NA	TRUE
364	chr2R	19632566	19633590	*	l(2)tid	FALSE	FALSE	FALSE	TRUE	FALSE	FALSE	NA	NA	FALSE
365	chr2R	19727288	19727909	*	ytr	FALSE	FALSE	TRUE	FALSE	FALSE	FALSE	NA	NA	FALSE
366	chr2R	19729326	19729821	*	ytr	FALSE	FALSE	FALSE	FALSE	TRUE	FALSE	NA	NA	TRUE
367	chr2R	20684830	20685292	*	Orc4	FALSE	FALSE	FALSE	TRUE	FALSE	FALSE	NA	NA	FALSE
368	chr2R	20688125	20688837	*	Orc4	TRUE	TRUE	FALSE	FALSE	TRUE	FALSE	NA	NA	TRUE
369	chr2R	20695899	20696627	*	Dll	TRUE	TRUE	FALSE	FALSE	TRUE	FALSE	VT22068	NA	TRUE
370	chr2R	20732294	20732872	*	Dll	FALSE	FALSE	FALSE	TRUE	FALSE	FALSE	VT22088	NA	TRUE
371	chr2R	20761862	20762700	*	CG30423	FALSE	FALSE	FALSE	TRUE	FALSE	FALSE	NA	NA	FALSE
372	chr2R	20790918	20791765	*	RpL41	FALSE	FALSE	FALSE	TRUE	FALSE	FALSE	NA	NA	FALSE
373	chr2R	20905701	20906424	*	NA	TRUE	TRUE	FALSE	FALSE	TRUE	FALSE	NA	NA	TRUE
374	chr2R	20956956	20957661	*	gsb	FALSE	FALSE	FALSE	FALSE	FALSE	TRUE	NA	NA	FALSE
375	chr2R	20994853	20995674	*	NA	TRUE	TRUE	FALSE	FALSE	TRUE	FALSE	VT22223	NA	TRUE
376	chr2R	21022216	21022775	*	NA	FALSE	TRUE	FALSE	TRUE	FALSE	FALSE	NA	NA	TRUE
377	chr2R	21109908	21111041	*	Kr	FALSE	TRUE	TRUE	FALSE	FALSE	FALSE	VT22278	NA	TRUE
378	chr2R	21111584	21111953	*	Kr	TRUE	FALSE	FALSE	FALSE	FALSE	TRUE	NA	NA	FALSE
379	chr3L	128426	128970	*	Pdk1	FALSE	FALSE	FALSE	TRUE	FALSE	FALSE	NA	NA	TRUE
380	chr3L	137777	138394	*	Pdk1	TRUE	TRUE	FALSE	TRUE	FALSE	FALSE	NA	NA	TRUE
381	chr3L	206019	207013	*	CG13876	TRUE	FALSE	FALSE	TRUE	FALSE	FALSE	NA	NA	FALSE
382	chr3L	223990	225009	*	CG33229	FALSE	FALSE	FALSE	TRUE	FALSE	FALSE	NA	NA	FALSE
383	chr3L	257768	258623	*	DIP2	FALSE	FALSE	FALSE	TRUE	FALSE	FALSE	NA	NA	FALSE
384	chr3L	374784	375474	*	trh	FALSE	TRUE	FALSE	FALSE	TRUE	FALSE	NA	NA	TRUE
385	chr3L	543944	544552	*	hipk	FALSE	FALSE	TRUE	FALSE	FALSE	FALSE	NA	NA	TRUE
386	chr3L	617749	618400	*	CR43334	FALSE	FALSE	FALSE	TRUE	FALSE	FALSE	NA	NA	TRUE
387	chr3L	695557	696866	*	CG13894	TRUE	TRUE	FALSE	FALSE	FALSE	TRUE	NA	NA	TRUE
388	chr3L	697500	698183	*	CG13894	TRUE	TRUE	FALSE	TRUE	FALSE	FALSE	NA	NA	TRUE
389	chr3L	735007	735683	*	emc	FALSE	TRUE	FALSE	FALSE	TRUE	FALSE	NA	NA	TRUE
390	chr3L	749240	749802	*	emc	FALSE	FALSE	FALSE	TRUE	FALSE	FALSE	NA	NA	FALSE
391	chr3L	753127	754209	*	emc	FALSE	TRUE	FALSE	TRUE	FALSE	FALSE	NA	NA	TRUE
392	chr3L	755054	755481	*	emc	FALSE	FALSE	FALSE	FALSE	FALSE	TRUE	NA	hc_48	TRUE
393	chr3L	1312972	1313881	*	CG9186	FALSE	FALSE	FALSE	TRUE	FALSE	FALSE	NA	NA	FALSE
394	chr3L	1352027	1352538	*	NA	FALSE	FALSE	TRUE	FALSE	FALSE	FALSE	NA	NA	FALSE
395	chr3L	1461629	1462852	*	NA	FALSE	TRUE	FALSE	TRUE	FALSE	FALSE	NA	NA	TRUE
396	chr3L	2228338	2229329	*	CG9018	FALSE	FALSE	FALSE	TRUE	FALSE	FALSE	NA	NA	FALSE
397	chr3L	2392969	2394148	*	NA	FALSE	TRUE	FALSE	TRUE	FALSE	FALSE	NA	NA	TRUE
398	chr3L	2586031	2586973	*	msn	FALSE	FALSE	FALSE	TRUE	FALSE	FALSE	NA	NA	TRUE
399	chr3L	3193824	3194895	*	Hsp83	TRUE	FALSE	FALSE	TRUE	FALSE	FALSE	NA	NA	FALSE
400	chr3L	3336576	3337546	*	kst	FALSE	FALSE	TRUE	FALSE	FALSE	FALSE	NA	NA	FALSE
401	chr3L	3813919	3814652	*	Scsalpha	FALSE	FALSE	FALSE	TRUE	FALSE	FALSE	NA	NA	FALSE
402	chr3L	4040112	4041110	*	CG11593	FALSE	FALSE	FALSE	TRUE	FALSE	FALSE	NA	NA	TRUE
403	chr3L	4108001	4109020	*	Ack	FALSE	TRUE	FALSE	TRUE	FALSE	FALSE	NA	NA	FALSE
404	chr3L	4167090	4168131	*	mas	FALSE	TRUE	TRUE	FALSE	FALSE	FALSE	NA	NA	TRUE
405	chr3L	4227079	4227579	*	ImpL2	FALSE	FALSE	TRUE	FALSE	FALSE	FALSE	NA	NA	FALSE
406	chr3L	4232097	4232666	*	ImpL2	TRUE	FALSE	FALSE	FALSE	FALSE	TRUE	NA	NA	TRUE
407	chr3L	4293097	4293554	*	CG1319	FALSE	FALSE	FALSE	FALSE	TRUE	FALSE	NA	NA	FALSE
408	chr3L	4625672	4626484	*	Src64B	FALSE	FALSE	FALSE	TRUE	FALSE	FALSE	NA	NA	TRUE
409	chr3L	4634548	4635446	*	Rpd3	FALSE	TRUE	TRUE	FALSE	FALSE	FALSE	NA	hc_51	TRUE
410	chr3L	4694139	4695322	*	CG15876	FALSE	TRUE	FALSE	TRUE	FALSE	FALSE	NA	NA	TRUE
411	chr3L	4696264	4697956	*	CG15876	FALSE	TRUE	TRUE	FALSE	FALSE	FALSE	NA	hc_8	TRUE
412	chr3L	4757214	4758395	*	CG13711	FALSE	TRUE	TRUE	FALSE	FALSE	FALSE	NA	NA	TRUE
413	chr3L	4842523	4843148	*	Aats-leu	FALSE	FALSE	FALSE	FALSE	TRUE	FALSE	NA	NA	FALSE
414	chr3L	5128316	5129948	*	CG10674	FALSE	TRUE	FALSE	TRUE	FALSE	FALSE	NA	NA	TRUE
415	chr3L	5613859	5615102	*	Blimp-1	FALSE	TRUE	FALSE	TRUE	FALSE	FALSE	VT26124	NA	TRUE
416	chr3L	5757104	5757740	*	CG10576	FALSE	FALSE	FALSE	FALSE	FALSE	TRUE	NA	NA	TRUE
417	chr3L	5799700	5801289	*	S6k	TRUE	TRUE	FALSE	TRUE	FALSE	FALSE	NA	NA	TRUE
418	chr3L	5828860	5829508	*	vn	FALSE	TRUE	FALSE	TRUE	FALSE	FALSE	NA	NA	TRUE
419	chr3L	5871743	5872435	*	DNApol-epsilon58	FALSE	FALSE	FALSE	TRUE	FALSE	FALSE	NA	NA	FALSE
420	chr3L	5967266	5967923	*	CG10479	FALSE	TRUE	FALSE	TRUE	FALSE	FALSE	NA	NA	TRUE
421	chr3L	5989332	5990091	*	CG10479	FALSE	FALSE	FALSE	FALSE	FALSE	TRUE	NA	NA	TRUE
422	chr3L	6256442	6256980	*	ImpL3	FALSE	FALSE	FALSE	FALSE	TRUE	FALSE	NA	NA	FALSE
423	chr3L	6735951	6736391	*	dikar	FALSE	FALSE	FALSE	TRUE	FALSE	FALSE	NA	NA	FALSE
424	chr3L	6760169	6760725	*	CG10103	FALSE	TRUE	TRUE	FALSE	FALSE	FALSE	VT26720	NA	TRUE
425	chr3L	6813944	6814807	*	vvl	FALSE	TRUE	FALSE	FALSE	TRUE	FALSE	VT26747	NA	TRUE
426	chr3L	6972334	6973494	*	Galphai	FALSE	FALSE	FALSE	TRUE	FALSE	FALSE	VT26830	NA	TRUE
427	chr3L	7130819	7131858	*	melt	TRUE	FALSE	FALSE	FALSE	TRUE	FALSE	NA	NA	TRUE
428	chr3L	7401133	7401608	*	smid	FALSE	FALSE	TRUE	FALSE	FALSE	FALSE	NA	NA	TRUE
429	chr3L	7511951	7512878	*	ltl	FALSE	FALSE	TRUE	FALSE	FALSE	FALSE	NA	NA	TRUE
430	chr3L	8336249	8336880	*	DNApol-alpha50	TRUE	TRUE	FALSE	TRUE	FALSE	FALSE	NA	NA	TRUE
431	chr3L	8414184	8414784	*	Cbl	FALSE	FALSE	FALSE	TRUE	FALSE	FALSE	NA	NA	TRUE
432	chr3L	8439551	8439874	*	CG6983	FALSE	FALSE	FALSE	TRUE	FALSE	FALSE	NA	NA	FALSE
433	chr3L	8445335	8446388	*	Gug	FALSE	FALSE	FALSE	FALSE	TRUE	FALSE	NA	NA	FALSE
434	chr3L	8455710	8456406	*	Gug	FALSE	FALSE	FALSE	TRUE	FALSE	FALSE	NA	hc_56	TRUE
435	chr3L	8517758	8518801	*	foi	FALSE	FALSE	TRUE	FALSE	FALSE	FALSE	NA	NA	FALSE
436	chr3L	8646490	8647264	*	Cdc6	FALSE	TRUE	TRUE	FALSE	FALSE	FALSE	VT27671	NA	TRUE
437	chr3L	8659153	8660095	*	h	FALSE	FALSE	FALSE	FALSE	TRUE	FALSE	NA	NA	TRUE
438	chr3L	8662994	8663718	*	h	FALSE	TRUE	FALSE	TRUE	FALSE	FALSE	VT27680	NA	TRUE
439	chr3L	8663811	8665013	*	h	FALSE	TRUE	FALSE	FALSE	FALSE	TRUE	VT27682	NA	TRUE
440	chr3L	8680630	8681151	*	h	TRUE	FALSE	FALSE	TRUE	FALSE	FALSE	VT27690	NA	TRUE
441	chr3L	8990778	8991365	*	smg	FALSE	FALSE	FALSE	TRUE	FALSE	FALSE	NA	NA	FALSE
442	chr3L	8995592	8996211	*	Doc3	FALSE	TRUE	FALSE	TRUE	FALSE	FALSE	NA	NA	TRUE
443	chr3L	9003354	9004213	*	Doc2	FALSE	TRUE	FALSE	FALSE	TRUE	FALSE	NA	NA	TRUE
444	chr3L	9021976	9023225	*	Doc2	FALSE	TRUE	FALSE	TRUE	FALSE	FALSE	NA	NA	TRUE
445	chr3L	9360969	9362411	*	CG4452	FALSE	TRUE	FALSE	FALSE	TRUE	FALSE	NA	NA	TRUE
446	chr3L	9383580	9384067	*	CG4080	TRUE	FALSE	FALSE	FALSE	TRUE	FALSE	NA	NA	TRUE
447	chr3L	9448994	9449854	*	phol	FALSE	FALSE	FALSE	FALSE	TRUE	FALSE	NA	NA	FALSE
448	chr3L	9454722	9456296	*	NA	FALSE	TRUE	FALSE	TRUE	FALSE	FALSE	NA	NA	TRUE
449	chr3L	9484202	9484927	*	CG32037	TRUE	TRUE	FALSE	FALSE	TRUE	FALSE	NA	NA	TRUE
450	chr3L	9607004	9607443	*	NA	FALSE	FALSE	FALSE	TRUE	FALSE	FALSE	NA	NA	FALSE
451	chr3L	9796730	9797819	*	Ilp4	FALSE	TRUE	FALSE	TRUE	FALSE	FALSE	NA	NA	TRUE
452	chr3L	10508854	10510050	*	A2bp1	FALSE	FALSE	FALSE	TRUE	FALSE	FALSE	NA	NA	TRUE
453	chr3L	10657527	10658136	*	simj	FALSE	FALSE	FALSE	TRUE	FALSE	FALSE	NA	NA	FALSE
454	chr3L	10849605	10850252	*	tna	FALSE	FALSE	FALSE	TRUE	FALSE	FALSE	NA	NA	TRUE
455	chr3L	11229724	11230832	*	Ir68a	FALSE	TRUE	TRUE	FALSE	FALSE	FALSE	NA	NA	TRUE
456	chr3L	11231050	11231600	*	Ir68a	FALSE	TRUE	TRUE	FALSE	FALSE	FALSE	NA	NA	TRUE
457	chr3L	11333401	11333999	*	scyl	FALSE	FALSE	FALSE	FALSE	FALSE	TRUE	NA	NA	TRUE
458	chr3L	11337608	11338150	*	scyl	FALSE	TRUE	FALSE	TRUE	FALSE	FALSE	NA	NA	TRUE
459	chr3L	11349728	11350824	*	scyl	FALSE	TRUE	TRUE	FALSE	FALSE	FALSE	NA	NA	TRUE
460	chr3L	11466488	11467081	*	chrb	TRUE	FALSE	FALSE	FALSE	FALSE	TRUE	NA	NA	TRUE
461	chr3L	11602045	11603123	*	CG6091	FALSE	FALSE	TRUE	FALSE	FALSE	FALSE	NA	NA	FALSE
462	chr3L	11704908	11705412	*	crim	FALSE	FALSE	FALSE	FALSE	TRUE	FALSE	NA	NA	FALSE
463	chr3L	11808228	11808796	*	RpL10Ab	FALSE	FALSE	FALSE	TRUE	FALSE	FALSE	NA	NA	FALSE
464	chr3L	11918072	11919121	*	byn	FALSE	TRUE	FALSE	TRUE	FALSE	FALSE	NA	NA	TRUE
465	chr3L	12076236	12077053	*	Sema-5c	FALSE	TRUE	FALSE	TRUE	FALSE	FALSE	NA	NA	TRUE
466	chr3L	12270021	12271123	*	CG4300	FALSE	FALSE	TRUE	FALSE	FALSE	FALSE	NA	NA	TRUE
467	chr3L	12519193	12520207	*	eIF-2beta	FALSE	FALSE	FALSE	TRUE	FALSE	FALSE	NA	NA	FALSE
468	chr3L	12642192	12642978	*	CR32111	FALSE	TRUE	TRUE	FALSE	FALSE	FALSE	VT29778	NA	TRUE
469	chr3L	13034440	13035157	*	RpS4	FALSE	FALSE	TRUE	FALSE	FALSE	FALSE	VT29977	NA	FALSE
470	chr3L	13049781	13050384	*	CG11279	TRUE	FALSE	FALSE	FALSE	FALSE	TRUE	NA	NA	TRUE
471	chr3L	13070554	13071118	*	CG11279	FALSE	FALSE	TRUE	FALSE	FALSE	FALSE	NA	NA	TRUE
472	chr3L	13077432	13077838	*	trn	FALSE	FALSE	FALSE	TRUE	FALSE	FALSE	NA	NA	FALSE
473	chr3L	13088247	13089562	*	trn	FALSE	FALSE	FALSE	FALSE	FALSE	TRUE	NA	NA	FALSE
474	chr3L	13094942	13095324	*	trn	FALSE	FALSE	FALSE	TRUE	FALSE	FALSE	NA	NA	TRUE
475	chr3L	13112845	13113855	*	trn	FALSE	FALSE	FALSE	FALSE	FALSE	TRUE	VT30021	NA	TRUE
476	chr3L	13238241	13238798	*	caps	FALSE	FALSE	FALSE	TRUE	FALSE	FALSE	VT30091	NA	FALSE
477	chr3L	13361698	13362474	*	SNCF	FALSE	TRUE	FALSE	FALSE	FALSE	TRUE	NA	NA	TRUE
478	chr3L	13371132	13372771	*	SNCF	FALSE	TRUE	TRUE	FALSE	FALSE	FALSE	NA	NA	TRUE
479	chr3L	13374163	13374506	*	SNCF	FALSE	FALSE	FALSE	FALSE	FALSE	TRUE	NA	NA	TRUE
480	chr3L	13830380	13831685	*	CG8745	FALSE	TRUE	FALSE	FALSE	FALSE	TRUE	NA	NA	TRUE
481	chr3L	13838436	13838750	*	CG8745	FALSE	FALSE	FALSE	TRUE	FALSE	FALSE	NA	NA	FALSE
482	chr3L	14021693	14022556	*	ptip	FALSE	FALSE	FALSE	TRUE	FALSE	FALSE	NA	NA	FALSE
483	chr3L	14062311	14062711	*	Pex1	FALSE	FALSE	FALSE	TRUE	FALSE	FALSE	NA	NA	FALSE
484	chr3L	14124794	14125107	*	D	FALSE	FALSE	TRUE	FALSE	FALSE	FALSE	NA	NA	TRUE
485	chr3L	14142725	14143759	*	D	FALSE	TRUE	FALSE	FALSE	TRUE	FALSE	NA	hc_10	TRUE
486	chr3L	14146457	14147412	*	D	FALSE	TRUE	FALSE	TRUE	FALSE	FALSE	NA	NA	TRUE
487	chr3L	14166089	14167111	*	D	FALSE	FALSE	TRUE	FALSE	FALSE	FALSE	NA	NA	TRUE
488	chr3L	14271325	14272570	*	fz	FALSE	FALSE	FALSE	FALSE	TRUE	FALSE	VT30618	NA	FALSE
489	chr3L	14530431	14530947	*	Mpcp	FALSE	FALSE	TRUE	FALSE	FALSE	FALSE	NA	NA	FALSE
490	chr3L	14574484	14574978	*	HGTX	FALSE	FALSE	TRUE	FALSE	FALSE	FALSE	NA	NA	TRUE
491	chr3L	14575810	14576256	*	HGTX	FALSE	FALSE	FALSE	FALSE	FALSE	TRUE	NA	NA	FALSE
492	chr3L	14633381	14634050	*	dlp	FALSE	TRUE	FALSE	FALSE	TRUE	FALSE	NA	NA	TRUE
493	chr3L	14794884	14795636	*	NHP2	FALSE	FALSE	FALSE	TRUE	FALSE	FALSE	NA	NA	TRUE
494	chr3L	15033382	15034087	*	ind	FALSE	TRUE	FALSE	TRUE	FALSE	FALSE	NA	NA	TRUE
495	chr3L	15038043	15038716	*	ind	FALSE	TRUE	TRUE	FALSE	FALSE	FALSE	NA	NA	TRUE
496	chr3L	15216422	15217552	*	Tollo	FALSE	TRUE	FALSE	TRUE	FALSE	FALSE	NA	hc_23	TRUE
497	chr3L	15225484	15226453	*	Tollo	FALSE	TRUE	FALSE	FALSE	TRUE	FALSE	VT31118	NA	TRUE
498	chr3L	15254886	15255895	*	Tollo	FALSE	TRUE	FALSE	TRUE	FALSE	FALSE	NA	NA	TRUE
499	chr3L	15306039	15307027	*	Toll-6	FALSE	FALSE	FALSE	FALSE	FALSE	TRUE	NA	NA	TRUE
500	chr3L	15501527	15503561	*	CG13454	FALSE	TRUE	TRUE	FALSE	FALSE	FALSE	NA	NA	TRUE
501	chr3L	15508465	15509165	*	CG13454	FALSE	FALSE	FALSE	FALSE	FALSE	TRUE	NA	NA	TRUE
502	chr3L	15694482	15695329	*	comm2	FALSE	TRUE	FALSE	FALSE	TRUE	FALSE	NA	NA	TRUE
503	chr3L	15828051	15828677	*	CG18081	FALSE	FALSE	TRUE	FALSE	FALSE	FALSE	NA	NA	FALSE
504	chr3L	15979276	15979734	*	Hip14	TRUE	TRUE	FALSE	FALSE	TRUE	FALSE	NA	NA	FALSE
505	chr3L	16010419	16012173	*	Notum	FALSE	TRUE	FALSE	FALSE	TRUE	FALSE	NA	NA	TRUE
506	chr3L	16018054	16019008	*	Notum	FALSE	TRUE	FALSE	TRUE	FALSE	FALSE	NA	NA	TRUE
507	chr3L	16214848	16215245	*	l(3)72Dn	FALSE	FALSE	FALSE	TRUE	FALSE	FALSE	NA	NA	FALSE
508	chr3L	16219354	16220142	*	l(3)72Dn	FALSE	FALSE	FALSE	FALSE	FALSE	TRUE	NA	NA	TRUE
509	chr3L	16224860	16225546	*	PDCD-5	FALSE	FALSE	TRUE	FALSE	FALSE	FALSE	NA	NA	FALSE
510	chr3L	16403065	16405092	*	fax	FALSE	FALSE	FALSE	TRUE	FALSE	FALSE	NA	NA	TRUE
511	chr3L	16640736	16641308	*	Abl	FALSE	FALSE	FALSE	TRUE	FALSE	FALSE	NA	NA	FALSE
512	chr3L	16704382	16705979	*	Lasp	FALSE	FALSE	FALSE	TRUE	FALSE	FALSE	NA	NA	TRUE
513	chr3L	17003055	17005867	*	CG3764	FALSE	FALSE	FALSE	TRUE	FALSE	FALSE	NA	NA	TRUE
514	chr3L	17332226	17332724	*	CG6479	FALSE	FALSE	FALSE	TRUE	FALSE	FALSE	NA	NA	FALSE
515	chr3L	17345890	17347058	*	CG7692	FALSE	FALSE	FALSE	TRUE	FALSE	FALSE	NA	NA	TRUE
516	chr3L	17358684	17359191	*	Cad74A	FALSE	FALSE	TRUE	FALSE	FALSE	FALSE	NA	NA	FALSE
517	chr3L	17506719	17507784	*	CG7564	FALSE	FALSE	FALSE	TRUE	FALSE	FALSE	NA	NA	FALSE
518	chr3L	17527468	17528003	*	Nedd4	FALSE	FALSE	FALSE	FALSE	TRUE	FALSE	NA	NA	FALSE
519	chr3L	17548694	17549879	*	CycT	FALSE	TRUE	FALSE	TRUE	FALSE	FALSE	NA	NA	TRUE
520	chr3L	17643093	17644007	*	Ndfip	FALSE	TRUE	FALSE	TRUE	FALSE	FALSE	NA	NA	TRUE
521	chr3L	17758315	17759062	*	Adgf-A	FALSE	FALSE	FALSE	FALSE	TRUE	FALSE	NA	NA	TRUE
522	chr3L	18159934	18160627	*	hid	FALSE	FALSE	FALSE	TRUE	FALSE	FALSE	NA	NA	TRUE
523	chr3L	18211507	18212127	*	hid	TRUE	TRUE	FALSE	FALSE	TRUE	FALSE	NA	NA	TRUE
524	chr3L	18289157	18290275	*	grim	FALSE	TRUE	FALSE	TRUE	FALSE	FALSE	NA	NA	TRUE
525	chr3L	18349305	18349875	*	rpr	FALSE	FALSE	FALSE	TRUE	FALSE	FALSE	NA	NA	TRUE
526	chr3L	18353022	18353633	*	rpr	FALSE	FALSE	TRUE	FALSE	FALSE	FALSE	NA	NA	FALSE
527	chr3L	18354042	18355221	*	rpr	FALSE	TRUE	FALSE	TRUE	FALSE	FALSE	NA	NA	TRUE
528	chr3L	18581398	18582044	*	CG7271	FALSE	TRUE	TRUE	FALSE	FALSE	FALSE	NA	NA	TRUE
529	chr3L	18586636	18587167	*	term	FALSE	TRUE	TRUE	FALSE	FALSE	FALSE	NA	NA	TRUE
530	chr3L	18843882	18844455	*	Indy	FALSE	TRUE	FALSE	FALSE	FALSE	TRUE	NA	NA	TRUE
531	chr3L	19026468	19027309	*	nkd	FALSE	TRUE	FALSE	TRUE	FALSE	FALSE	NA	NA	TRUE
532	chr3L	19028725	19029765	*	nkd	FALSE	FALSE	FALSE	TRUE	FALSE	FALSE	NA	NA	TRUE
533	chr3L	19055732	19056467	*	CG3797	FALSE	FALSE	FALSE	TRUE	FALSE	FALSE	NA	NA	FALSE
534	chr3L	19079310	19079679	*	Mkp3	FALSE	FALSE	FALSE	TRUE	FALSE	FALSE	NA	NA	TRUE
535	chr3L	19133303	19134012	*	fz2	FALSE	FALSE	FALSE	TRUE	FALSE	FALSE	VT33156	NA	FALSE
536	chr3L	19287260	19288177	*	CG9666	FALSE	FALSE	TRUE	FALSE	FALSE	FALSE	NA	NA	FALSE
537	chr3L	19553761	19554591	*	l(3)76BDr	FALSE	TRUE	FALSE	FALSE	FALSE	TRUE	NA	NA	TRUE
538	chr3L	19644225	19644869	*	tey	FALSE	FALSE	FALSE	FALSE	FALSE	TRUE	NA	NA	TRUE
539	chr3L	19784041	19785273	*	CG42637	FALSE	FALSE	FALSE	TRUE	FALSE	FALSE	NA	NA	TRUE
540	chr3L	19800100	19800862	*	Kap-alpha1	FALSE	FALSE	FALSE	TRUE	FALSE	FALSE	NA	NA	TRUE
541	chr3L	19906724	19907299	*	Mtr3	FALSE	FALSE	FALSE	TRUE	FALSE	FALSE	NA	NA	FALSE
542	chr3L	19907865	19908406	*	Rpn1	FALSE	FALSE	TRUE	FALSE	FALSE	FALSE	NA	NA	FALSE
543	chr3L	20302882	20303835	*	polo	FALSE	FALSE	FALSE	TRUE	FALSE	FALSE	NA	NA	TRUE
544	chr3L	20395412	20396561	*	trbl	FALSE	TRUE	FALSE	TRUE	FALSE	FALSE	VT33785	NA	TRUE
545	chr3L	20507102	20507898	*	CG5059	FALSE	FALSE	FALSE	TRUE	FALSE	FALSE	NA	NA	FALSE
546	chr3L	20509511	20510944	*	CG5059	FALSE	FALSE	FALSE	TRUE	FALSE	FALSE	NA	NA	TRUE
547	chr3L	20615989	20617256	*	knrl	FALSE	FALSE	FALSE	FALSE	TRUE	FALSE	NA	NA	TRUE
548	chr3L	20622054	20623169	*	knrl	FALSE	FALSE	FALSE	FALSE	FALSE	TRUE	NA	NA	FALSE
549	chr3L	20687125	20688782	*	kni	FALSE	FALSE	FALSE	FALSE	FALSE	FALSE	VT33934	NA	TRUE
550	chr3L	20689644	20691042	*	kni	FALSE	FALSE	TRUE	FALSE	FALSE	FALSE	NA	NA	TRUE
551	chr3L	20692556	20693527	*	kni	TRUE	FALSE	FALSE	FALSE	FALSE	TRUE	VT33936	NA	TRUE
552	chr3L	20788328	20788775	*	Six4	FALSE	FALSE	FALSE	TRUE	FALSE	FALSE	NA	NA	FALSE
553	chr3L	20834433	20835284	*	CSN3	FALSE	FALSE	FALSE	TRUE	FALSE	FALSE	NA	NA	FALSE
554	chr3L	20974107	20974897	*	skd	FALSE	TRUE	FALSE	FALSE	FALSE	TRUE	NA	NA	TRUE
555	chr3L	21025990	21026369	*	Sin	FALSE	FALSE	FALSE	TRUE	FALSE	FALSE	NA	NA	TRUE
556	chr3L	21027296	21028082	*	siz	FALSE	FALSE	FALSE	FALSE	TRUE	FALSE	NA	NA	FALSE
557	chr3L	21138765	21139962	*	Ac78C	FALSE	TRUE	FALSE	TRUE	FALSE	FALSE	NA	NA	TRUE
558	chr3L	21144764	21145064	*	Ac78C	FALSE	FALSE	FALSE	TRUE	FALSE	FALSE	NA	NA	FALSE
559	chr3L	21205928	21206337	*	CG12975	FALSE	FALSE	FALSE	TRUE	FALSE	FALSE	NA	NA	FALSE
560	chr3L	21274280	21274841	*	ppl	FALSE	FALSE	FALSE	TRUE	FALSE	FALSE	NA	NA	FALSE
561	chr3L	21291525	21292265	*	CG7632	FALSE	TRUE	FALSE	TRUE	FALSE	FALSE	NA	NA	TRUE
562	chr3L	21339232	21340878	*	ebd2	FALSE	FALSE	FALSE	TRUE	FALSE	FALSE	NA	NA	TRUE
563	chr3L	21442200	21443092	*	Syx7	TRUE	FALSE	FALSE	FALSE	FALSE	TRUE	NA	NA	TRUE
564	chr3L	21472641	21474394	*	croc	FALSE	TRUE	FALSE	FALSE	FALSE	TRUE	NA	NA	TRUE
565	chr3L	21474867	21475465	*	Neu2	FALSE	FALSE	FALSE	TRUE	FALSE	FALSE	NA	NA	TRUE
566	chr3L	21500375	21501080	*	Glg1	FALSE	FALSE	FALSE	TRUE	FALSE	FALSE	NA	NA	FALSE
567	chr3L	21508553	21509694	*	SAK	FALSE	FALSE	FALSE	TRUE	FALSE	FALSE	NA	NA	TRUE
568	chr3L	21587213	21587697	*	CG32441	FALSE	FALSE	FALSE	FALSE	TRUE	FALSE	VT34395	NA	TRUE
569	chr3L	22129023	22130144	*	olf413	FALSE	FALSE	FALSE	TRUE	FALSE	FALSE	NA	hc_50	TRUE
570	chr3L	22395431	22397278	*	Ten-m	TRUE	FALSE	FALSE	TRUE	FALSE	FALSE	NA	hc_26	TRUE
571	chr3L	22533656	22534362	*	laza	FALSE	FALSE	FALSE	FALSE	FALSE	TRUE	NA	NA	TRUE
572	chr3L	22550001	22550234	*	laza	FALSE	FALSE	FALSE	TRUE	FALSE	FALSE	NA	NA	FALSE
573	chr3L	22609911	22610367	*	CR43270	FALSE	FALSE	FALSE	TRUE	FALSE	FALSE	NA	NA	FALSE
574	chr3L	22856704	22857167	*	CG33170	FALSE	FALSE	FALSE	TRUE	FALSE	FALSE	VT35031	NA	TRUE
575	chr3L	22878965	22879461	*	Chro	FALSE	FALSE	FALSE	FALSE	FALSE	TRUE	NA	NA	TRUE
576	chr3L	22996762	22997611	*	nrm	FALSE	FALSE	FALSE	TRUE	FALSE	FALSE	NA	NA	TRUE
577	chr3R	1	1786	*	CG12581	FALSE	TRUE	FALSE	TRUE	FALSE	FALSE	NA	NA	TRUE
578	chr3R	166189	166652	*	CG1103	FALSE	FALSE	FALSE	TRUE	FALSE	FALSE	NA	NA	TRUE
579	chr3R	173767	174893	*	hkb	FALSE	TRUE	FALSE	TRUE	FALSE	FALSE	NA	NA	TRUE
580	chr3R	176286	176741	*	hkb	FALSE	FALSE	FALSE	TRUE	FALSE	FALSE	NA	NA	TRUE
581	chr3R	177972	178460	*	hkb	TRUE	FALSE	FALSE	FALSE	TRUE	FALSE	VT36301	NA	TRUE
582	chr3R	283837	284731	*	CG31522	FALSE	TRUE	FALSE	TRUE	FALSE	FALSE	VT36350	NA	TRUE
583	chr3R	550433	550992	*	tacc	FALSE	FALSE	FALSE	FALSE	FALSE	TRUE	NA	NA	FALSE
584	chr3R	586884	587480	*	tacc	FALSE	TRUE	FALSE	TRUE	FALSE	FALSE	NA	NA	TRUE
585	chr3R	661060	661535	*	CG14657	FALSE	FALSE	FALSE	TRUE	FALSE	FALSE	NA	NA	TRUE
586	chr3R	671798	672305	*	opa	FALSE	TRUE	FALSE	TRUE	FALSE	FALSE	NA	NA	TRUE
587	chr3R	674352	675720	*	opa	FALSE	FALSE	TRUE	FALSE	FALSE	FALSE	NA	NA	TRUE
588	chr3R	679891	680513	*	opa	FALSE	FALSE	FALSE	TRUE	FALSE	FALSE	NA	NA	TRUE
589	chr3R	796153	796998	*	Ubc6	FALSE	FALSE	FALSE	TRUE	FALSE	FALSE	NA	NA	FALSE
590	chr3R	851589	852126	*	corto	FALSE	FALSE	FALSE	TRUE	FALSE	FALSE	NA	NA	FALSE
591	chr3R	864317	865698	*	corto	FALSE	FALSE	FALSE	TRUE	FALSE	FALSE	NA	NA	TRUE
592	chr3R	879573	880045	*	corto	FALSE	FALSE	FALSE	TRUE	FALSE	FALSE	NA	NA	TRUE
593	chr3R	915726	916502	*	corto	FALSE	TRUE	FALSE	TRUE	FALSE	FALSE	NA	NA	TRUE
594	chr3R	919935	920437	*	corto	FALSE	TRUE	FALSE	TRUE	FALSE	FALSE	NA	NA	TRUE
595	chr3R	950565	952077	*	CG12007	FALSE	TRUE	FALSE	TRUE	FALSE	FALSE	NA	NA	TRUE
596	chr3R	952464	952996	*	CG12007	FALSE	FALSE	FALSE	TRUE	FALSE	FALSE	NA	NA	TRUE
597	chr3R	1076823	1077731	*	CG12163	FALSE	FALSE	TRUE	FALSE	FALSE	FALSE	NA	NA	FALSE
598	chr3R	1497355	1499007	*	Atg17	FALSE	TRUE	FALSE	TRUE	FALSE	FALSE	NA	NA	TRUE
599	chr3R	1619831	1620843	*	CG2046	FALSE	FALSE	TRUE	FALSE	FALSE	FALSE	NA	NA	FALSE
600	chr3R	1928970	1929483	*	Gasp	TRUE	FALSE	FALSE	TRUE	FALSE	FALSE	NA	NA	TRUE
601	chr3R	2227882	2228836	*	Dmtn	FALSE	TRUE	FALSE	FALSE	FALSE	TRUE	NA	NA	TRUE
602	chr3R	2472186	2472843	*	Taf1	FALSE	FALSE	FALSE	TRUE	FALSE	FALSE	NA	NA	FALSE
603	chr3R	2488677	2489564	*	lab	FALSE	FALSE	FALSE	FALSE	FALSE	TRUE	VT37466	NA	TRUE
604	chr3R	2534417	2535006	*	lab	FALSE	FALSE	FALSE	TRUE	FALSE	FALSE	VT37487	NA	FALSE
605	chr3R	2570359	2570963	*	zen2	FALSE	TRUE	FALSE	TRUE	FALSE	FALSE	NA	NA	TRUE
606	chr3R	2579507	2580772	*	zen	FALSE	TRUE	TRUE	FALSE	FALSE	FALSE	VT37509	NA	TRUE
607	chr3R	2580837	2581685	*	zen	FALSE	TRUE	TRUE	FALSE	FALSE	FALSE	VT37509	NA	TRUE
608	chr3R	2617144	2617723	*	Dfd	FALSE	FALSE	FALSE	TRUE	FALSE	FALSE	NA	NA	TRUE
609	chr3R	2630280	2631040	*	Dfd	FALSE	TRUE	FALSE	FALSE	FALSE	TRUE	VT37537	NA	TRUE
610	chr3R	2635972	2636759	*	Dfd	FALSE	TRUE	FALSE	FALSE	TRUE	FALSE	VT37540	NA	TRUE
611	chr3R	2671194	2671953	*	ftz	FALSE	FALSE	TRUE	FALSE	FALSE	FALSE	VT37558	NA	TRUE
612	chr3R	2673664	2674074	*	ftz	TRUE	TRUE	FALSE	FALSE	FALSE	TRUE	VT37560	NA	TRUE
613	chr3R	2680057	2680379	*	ftz	FALSE	FALSE	FALSE	TRUE	FALSE	FALSE	VT37564	NA	FALSE
614	chr3R	2683191	2683931	*	ftz	FALSE	TRUE	TRUE	FALSE	FALSE	FALSE	VT37565	NA	TRUE
615	chr3R	2684461	2685086	*	ftz	FALSE	TRUE	FALSE	FALSE	FALSE	TRUE	VT37567	NA	TRUE
616	chr3R	2689300	2690240	*	ftz	FALSE	TRUE	TRUE	FALSE	FALSE	FALSE	NA	NA	TRUE
617	chr3R	2693678	2694626	*	ftz	FALSE	TRUE	FALSE	FALSE	FALSE	TRUE	VT37571	NA	TRUE
618	chr3R	2696512	2696850	*	ftz	FALSE	FALSE	FALSE	TRUE	FALSE	FALSE	VT37572	NA	FALSE
619	chr3R	2701003	2701428	*	ftz	FALSE	TRUE	FALSE	TRUE	FALSE	FALSE	NA	NA	TRUE
620	chr3R	2710903	2711466	*	Antp	FALSE	TRUE	FALSE	TRUE	FALSE	FALSE	VT37580	NA	TRUE
621	chr3R	2733046	2734262	*	Antp	FALSE	TRUE	FALSE	FALSE	TRUE	FALSE	NA	NA	TRUE
622	chr3R	2737867	2739090	*	Antp	FALSE	FALSE	FALSE	TRUE	FALSE	FALSE	NA	NA	TRUE
623	chr3R	2774493	2775589	*	Antp	FALSE	FALSE	FALSE	TRUE	FALSE	FALSE	NA	NA	TRUE
624	chr3R	2861283	2862033	*	CG1965	FALSE	TRUE	FALSE	FALSE	TRUE	FALSE	NA	NA	TRUE
625	chr3R	2862871	2863747	*	CG1965	FALSE	FALSE	FALSE	TRUE	FALSE	FALSE	NA	NA	TRUE
626	chr3R	2933919	2934813	*	Alh	FALSE	FALSE	FALSE	TRUE	FALSE	FALSE	NA	NA	TRUE
627	chr3R	3803033	3803984	*	CD98hc	FALSE	FALSE	FALSE	TRUE	FALSE	FALSE	VT38174	NA	FALSE
628	chr3R	3926505	3927000	*	CG7900	FALSE	FALSE	FALSE	FALSE	FALSE	TRUE	NA	NA	FALSE
629	chr3R	4016553	4016997	*	grn	FALSE	FALSE	FALSE	TRUE	FALSE	FALSE	NA	NA	TRUE
630	chr3R	4030917	4031737	*	grn	FALSE	TRUE	TRUE	FALSE	FALSE	FALSE	NA	NA	TRUE
631	chr3R	4095457	4095860	*	CG9630	FALSE	FALSE	FALSE	TRUE	FALSE	FALSE	NA	NA	FALSE
632	chr3R	4102779	4103994	*	ato	FALSE	TRUE	FALSE	FALSE	FALSE	TRUE	NA	NA	TRUE
633	chr3R	4107558	4108336	*	ato	FALSE	TRUE	FALSE	TRUE	FALSE	FALSE	NA	NA	TRUE
634	chr3R	4293289	4294443	*	NA	FALSE	TRUE	FALSE	TRUE	FALSE	FALSE	NA	NA	TRUE
635	chr3R	4294930	4295492	*	NA	FALSE	TRUE	FALSE	TRUE	FALSE	FALSE	NA	NA	TRUE
636	chr3R	4476277	4476933	*	Mkk4	FALSE	FALSE	FALSE	TRUE	FALSE	FALSE	NA	NA	TRUE
637	chr3R	4477724	4478825	*	Dhod	FALSE	FALSE	FALSE	TRUE	FALSE	FALSE	NA	NA	TRUE
638	chr3R	4514084	4514484	*	hb	TRUE	FALSE	FALSE	TRUE	FALSE	FALSE	VT38544	NA	TRUE
639	chr3R	4519954	4520862	*	hb	TRUE	FALSE	FALSE	FALSE	TRUE	FALSE	NA	NA	TRUE
640	chr3R	4524639	4525755	*	hb	TRUE	FALSE	FALSE	FALSE	TRUE	FALSE	NA	hc_1	TRUE
641	chr3R	4526198	4527394	*	hb	FALSE	TRUE	TRUE	FALSE	FALSE	FALSE	VT38550	NA	TRUE
642	chr3R	4666148	4668040	*	pyd	FALSE	FALSE	FALSE	TRUE	FALSE	FALSE	NA	NA	TRUE
643	chr3R	4755995	4757026	*	pyd	FALSE	TRUE	FALSE	TRUE	FALSE	FALSE	VT38668	NA	TRUE
644	chr3R	4770613	4770963	*	CG11964	FALSE	FALSE	TRUE	FALSE	FALSE	FALSE	NA	NA	FALSE
645	chr3R	4801352	4802492	*	RagA-B	FALSE	TRUE	FALSE	TRUE	FALSE	FALSE	NA	NA	TRUE
646	chr3R	4829546	4830340	*	CG11980	FALSE	FALSE	FALSE	TRUE	FALSE	FALSE	NA	NA	FALSE
647	chr3R	5451133	5451623	*	CG8312	FALSE	TRUE	TRUE	FALSE	FALSE	FALSE	NA	NA	TRUE
648	chr3R	5530327	5531497	*	Unc-115a	FALSE	FALSE	FALSE	TRUE	FALSE	FALSE	NA	NA	TRUE
649	chr3R	5738524	5739285	*	NA	TRUE	FALSE	FALSE	FALSE	FALSE	TRUE	NA	NA	TRUE
650	chr3R	5782393	5782906	*	NA	FALSE	FALSE	FALSE	TRUE	FALSE	FALSE	NA	NA	FALSE
651	chr3R	5937732	5938491	*	CG3940	FALSE	FALSE	FALSE	TRUE	FALSE	FALSE	NA	NA	TRUE
652	chr3R	6047877	6048850	*	CG12420	FALSE	TRUE	FALSE	FALSE	TRUE	FALSE	NA	NA	TRUE
653	chr3R	6049104	6050550	*	CG12420	TRUE	TRUE	FALSE	TRUE	FALSE	FALSE	NA	NA	FALSE
654	chr3R	6178298	6179756	*	jumu	FALSE	TRUE	FALSE	TRUE	FALSE	FALSE	NA	NA	TRUE
655	chr3R	6390506	6391015	*	hth	FALSE	FALSE	FALSE	FALSE	FALSE	TRUE	NA	NA	FALSE
656	chr3R	6396849	6397526	*	hth	TRUE	FALSE	FALSE	TRUE	FALSE	FALSE	NA	NA	TRUE
657	chr3R	6420071	6420454	*	hth	FALSE	FALSE	TRUE	FALSE	FALSE	FALSE	NA	NA	TRUE
658	chr3R	6428867	6429431	*	hth	FALSE	FALSE	FALSE	FALSE	TRUE	FALSE	VT39547	NA	TRUE
659	chr3R	6442441	6444017	*	hth	FALSE	TRUE	TRUE	FALSE	FALSE	FALSE	NA	NA	TRUE
660	chr3R	6444246	6444753	*	hth	FALSE	TRUE	FALSE	FALSE	TRUE	FALSE	VT39556	NA	TRUE
661	chr3R	6493481	6494364	*	CG14688	FALSE	FALSE	FALSE	FALSE	TRUE	FALSE	NA	NA	TRUE
662	chr3R	6500735	6501248	*	CG14688	FALSE	FALSE	FALSE	TRUE	FALSE	FALSE	NA	NA	FALSE
663	chr3R	6682207	6683084	*	CG4570	FALSE	TRUE	FALSE	TRUE	FALSE	FALSE	NA	NA	TRUE
664	chr3R	7086669	7087273	*	CG31388	FALSE	FALSE	FALSE	TRUE	FALSE	FALSE	NA	NA	FALSE
665	chr3R	7178314	7179490	*	pros	FALSE	TRUE	FALSE	TRUE	FALSE	FALSE	NA	NA	TRUE
666	chr3R	7204101	7204855	*	pros	FALSE	TRUE	FALSE	TRUE	FALSE	FALSE	NA	NA	TRUE
667	chr3R	7396981	7397637	*	Mrp4	TRUE	TRUE	FALSE	FALSE	TRUE	FALSE	VT40065	NA	TRUE
668	chr3R	7597039	7597448	*	NA	FALSE	FALSE	FALSE	TRUE	FALSE	FALSE	NA	NA	FALSE
669	chr3R	7823728	7824296	*	Ect3	FALSE	FALSE	FALSE	TRUE	FALSE	FALSE	NA	NA	TRUE
670	chr3R	7835752	7836808	*	KLHL18	FALSE	FALSE	FALSE	TRUE	FALSE	FALSE	NA	NA	FALSE
671	chr3R	7954243	7954862	*	CG4702	FALSE	FALSE	FALSE	TRUE	FALSE	FALSE	NA	NA	TRUE
672	chr3R	8086379	8087434	*	svp	FALSE	FALSE	FALSE	FALSE	FALSE	TRUE	NA	NA	TRUE
673	chr3R	8206692	8208827	*	CG10035	FALSE	TRUE	FALSE	TRUE	FALSE	FALSE	NA	NA	TRUE
674	chr3R	8239042	8239755	*	Dip-C	FALSE	FALSE	FALSE	TRUE	FALSE	FALSE	NA	NA	FALSE
675	chr3R	8265093	8265945	*	Aos1	FALSE	FALSE	FALSE	TRUE	FALSE	FALSE	NA	NA	FALSE
676	chr3R	8278405	8278772	*	CG18549	FALSE	FALSE	FALSE	TRUE	FALSE	FALSE	NA	NA	FALSE
677	chr3R	8471076	8472255	*	Dtg	FALSE	TRUE	TRUE	FALSE	FALSE	FALSE	NA	NA	TRUE
678	chr3R	8896812	8897355	*	sim	FALSE	FALSE	FALSE	TRUE	FALSE	FALSE	NA	NA	TRUE
679	chr3R	8897654	8898348	*	sim	FALSE	TRUE	FALSE	TRUE	FALSE	FALSE	VT40845	NA	TRUE
680	chr3R	9118679	9120519	*	wntD	FALSE	TRUE	FALSE	TRUE	FALSE	FALSE	NA	NA	TRUE
681	chr3R	9228592	9229270	*	yellow-e3	FALSE	FALSE	FALSE	TRUE	FALSE	FALSE	NA	NA	TRUE
682	chr3R	9230300	9231456	*	yellow-e3	FALSE	TRUE	FALSE	TRUE	FALSE	FALSE	NA	NA	TRUE
683	chr3R	9232088	9232757	*	yellow-e3	FALSE	FALSE	FALSE	FALSE	FALSE	TRUE	NA	NA	TRUE
684	chr3R	9440298	9440758	*	sqd	FALSE	FALSE	TRUE	FALSE	FALSE	FALSE	NA	NA	TRUE
685	chr3R	9468238	9468845	*	sqd	FALSE	FALSE	FALSE	TRUE	FALSE	FALSE	NA	NA	TRUE
686	chr3R	9526478	9526979	*	CG14367	FALSE	FALSE	FALSE	FALSE	FALSE	TRUE	NA	hc_49	FALSE
687	chr3R	9620198	9620718	*	CG9288	FALSE	FALSE	FALSE	TRUE	FALSE	FALSE	VT41227	NA	FALSE
688	chr3R	9637292	9638069	*	tal-AA	FALSE	TRUE	FALSE	FALSE	TRUE	FALSE	NA	NA	TRUE
689	chr3R	9663397	9663970	*	NA	FALSE	FALSE	TRUE	FALSE	FALSE	FALSE	NA	NA	FALSE
690	chr3R	9702908	9703219	*	ems	FALSE	FALSE	FALSE	FALSE	FALSE	TRUE	VT41271	NA	TRUE
691	chr3R	9704177	9704860	*	ems	TRUE	FALSE	FALSE	FALSE	FALSE	TRUE	NA	hc_24	TRUE
692	chr3R	9705009	9705969	*	ems	TRUE	FALSE	FALSE	FALSE	FALSE	TRUE	VT41273	hc_25	TRUE
693	chr3R	9720436	9720932	*	ems	TRUE	FALSE	FALSE	FALSE	TRUE	FALSE	NA	NA	TRUE
694	chr3R	9727080	9727803	*	ems	FALSE	FALSE	FALSE	TRUE	FALSE	FALSE	NA	NA	TRUE
695	chr3R	9736573	9737601	*	ems	TRUE	TRUE	FALSE	FALSE	FALSE	TRUE	NA	hc_18	TRUE
696	chr3R	9790098	9790773	*	Orc2	FALSE	FALSE	FALSE	TRUE	FALSE	FALSE	NA	NA	FALSE
697	chr3R	9796374	9798545	*	rdx	FALSE	TRUE	FALSE	TRUE	FALSE	FALSE	NA	NA	TRUE
698	chr3R	9846327	9846888	*	rdx	FALSE	FALSE	FALSE	FALSE	TRUE	FALSE	NA	NA	TRUE
699	chr3R	9851911	9852616	*	rdx	FALSE	FALSE	FALSE	TRUE	FALSE	FALSE	NA	NA	FALSE
700	chr3R	10335998	10337879	*	HtrA2	FALSE	FALSE	FALSE	TRUE	FALSE	FALSE	NA	NA	TRUE
701	chr3R	10454559	10455299	*	CG7886	TRUE	FALSE	FALSE	TRUE	FALSE	FALSE	NA	NA	TRUE
702	chr3R	10504963	10506320	*	NA	TRUE	TRUE	FALSE	TRUE	FALSE	FALSE	VT41687	NA	TRUE
703	chr3R	10509232	10509753	*	NA	TRUE	TRUE	FALSE	TRUE	FALSE	FALSE	VT41689	NA	TRUE
704	chr3R	10522337	10523239	*	NA	FALSE	FALSE	FALSE	TRUE	FALSE	FALSE	VT41696	NA	FALSE
705	chr3R	10679315	10680088	*	NA	FALSE	TRUE	FALSE	TRUE	FALSE	FALSE	NA	NA	TRUE
706	chr3R	10919816	10920915	*	CG6966	FALSE	FALSE	TRUE	FALSE	FALSE	FALSE	NA	NA	TRUE
707	chr3R	11088383	11089537	*	eIF-2gamma	FALSE	FALSE	FALSE	TRUE	FALSE	FALSE	NA	NA	TRUE
708	chr3R	11143971	11144634	*	ear	FALSE	FALSE	FALSE	TRUE	FALSE	FALSE	NA	NA	TRUE
709	chr3R	11243340	11244583	*	Atx2	FALSE	FALSE	FALSE	FALSE	TRUE	FALSE	NA	NA	TRUE
710	chr3R	11400790	11401188	*	pxb	FALSE	FALSE	FALSE	FALSE	FALSE	TRUE	NA	NA	TRUE
711	chr3R	11408965	11409702	*	pxb	TRUE	FALSE	FALSE	FALSE	FALSE	TRUE	NA	NA	TRUE
712	chr3R	11475318	11475996	*	pxb	FALSE	TRUE	FALSE	FALSE	FALSE	TRUE	NA	NA	TRUE
713	chr3R	11481581	11481864	*	pxb	FALSE	FALSE	TRUE	FALSE	FALSE	FALSE	NA	NA	FALSE
714	chr3R	11629678	11630425	*	alpha-Man-IIb	FALSE	FALSE	FALSE	TRUE	FALSE	FALSE	NA	NA	FALSE
715	chr3R	11745380	11746220	*	CG4221	FALSE	FALSE	FALSE	TRUE	FALSE	FALSE	NA	NA	TRUE
716	chr3R	11811857	11812533	*	srp	FALSE	FALSE	FALSE	FALSE	FALSE	TRUE	VT42349	NA	FALSE
717	chr3R	11814717	11815589	*	srp	FALSE	TRUE	FALSE	TRUE	FALSE	FALSE	VT42351	NA	TRUE
718	chr3R	11819857	11820735	*	srp	FALSE	FALSE	FALSE	TRUE	FALSE	FALSE	VT42353	NA	TRUE
719	chr3R	11859302	11860533	*	pnr	FALSE	TRUE	FALSE	TRUE	FALSE	FALSE	VT42372	NA	TRUE
720	chr3R	11879799	11880261	*	msps	TRUE	FALSE	FALSE	FALSE	FALSE	TRUE	NA	NA	TRUE
721	chr3R	12076817	12077573	*	tara	FALSE	TRUE	FALSE	TRUE	FALSE	FALSE	NA	NA	TRUE
722	chr3R	12086116	12086487	*	tara	FALSE	FALSE	FALSE	TRUE	FALSE	FALSE	VT42495	NA	FALSE
723	chr3R	12162399	12163273	*	Sulf1	FALSE	TRUE	FALSE	TRUE	FALSE	FALSE	NA	NA	TRUE
724	chr3R	12331861	12332330	*	CG42342	TRUE	FALSE	FALSE	TRUE	FALSE	FALSE	NA	NA	TRUE
725	chr3R	12332623	12333056	*	CG42342	FALSE	FALSE	FALSE	TRUE	FALSE	FALSE	NA	NA	FALSE
726	chr3R	12351870	12353261	*	CG42342	TRUE	TRUE	FALSE	TRUE	FALSE	FALSE	NA	NA	TRUE
727	chr3R	12356170	12356516	*	CG42342	FALSE	FALSE	FALSE	TRUE	FALSE	FALSE	NA	NA	TRUE
728	chr3R	12377669	12378050	*	CG42342	FALSE	FALSE	FALSE	FALSE	TRUE	FALSE	NA	NA	FALSE
729	chr3R	12395756	12396748	*	CG42342	FALSE	FALSE	FALSE	TRUE	FALSE	FALSE	NA	NA	TRUE
730	chr3R	12450372	12451249	*	Fas1	FALSE	FALSE	FALSE	TRUE	FALSE	FALSE	NA	NA	FALSE
731	chr3R	12465531	12466123	*	nonA-l	FALSE	FALSE	FALSE	TRUE	FALSE	FALSE	NA	NA	FALSE
732	chr3R	12545282	12546111	*	Ubx	FALSE	FALSE	FALSE	TRUE	FALSE	FALSE	NA	NA	TRUE
733	chr3R	12552220	12552555	*	Ubx	FALSE	FALSE	TRUE	FALSE	FALSE	FALSE	NA	NA	FALSE
734	chr3R	12556297	12556824	*	Ubx	FALSE	FALSE	FALSE	TRUE	FALSE	FALSE	VT42764	NA	TRUE
735	chr3R	12567493	12568594	*	bxd	FALSE	TRUE	FALSE	FALSE	TRUE	FALSE	NA	hc_20	TRUE
736	chr3R	12589526	12590264	*	bxd	FALSE	FALSE	FALSE	TRUE	FALSE	FALSE	NA	NA	TRUE
737	chr3R	12624119	12624803	*	bxd	FALSE	FALSE	FALSE	TRUE	FALSE	FALSE	NA	NA	TRUE
738	chr3R	12628545	12629116	*	NA	FALSE	TRUE	TRUE	FALSE	FALSE	FALSE	VT42787	NA	TRUE
739	chr3R	12637376	12637944	*	NA	FALSE	FALSE	FALSE	TRUE	FALSE	FALSE	VT42790	NA	TRUE
740	chr3R	12651814	12652696	*	NA	FALSE	TRUE	FALSE	TRUE	FALSE	FALSE	VT42799	NA	TRUE
741	chr3R	12694976	12695459	*	NA	FALSE	FALSE	FALSE	TRUE	FALSE	FALSE	NA	NA	FALSE
742	chr3R	12708114	12708739	*	NA	FALSE	FALSE	FALSE	TRUE	FALSE	FALSE	NA	NA	TRUE
743	chr3R	12724066	12724459	*	NA	FALSE	FALSE	FALSE	TRUE	FALSE	FALSE	NA	NA	FALSE
744	chr3R	12746090	12746524	*	NA	FALSE	FALSE	FALSE	TRUE	FALSE	FALSE	VT42848	NA	TRUE
745	chr3R	12746996	12747592	*	NA	FALSE	TRUE	FALSE	TRUE	FALSE	FALSE	NA	NA	TRUE
746	chr3R	12907500	12911490	*	kuk	FALSE	TRUE	TRUE	FALSE	FALSE	FALSE	NA	NA	TRUE
747	chr3R	13219389	13220587	*	CREG	FALSE	TRUE	FALSE	TRUE	FALSE	FALSE	NA	hc_19	TRUE
748	chr3R	13373629	13374340	*	SF1	FALSE	FALSE	FALSE	FALSE	TRUE	FALSE	NA	NA	FALSE
749	chr3R	13543559	13544448	*	osa	FALSE	FALSE	FALSE	TRUE	FALSE	FALSE	NA	NA	FALSE
750	chr3R	13547544	13548209	*	osa	FALSE	FALSE	FALSE	FALSE	TRUE	FALSE	NA	NA	FALSE
751	chr3R	13595460	13595849	*	CG43102	FALSE	FALSE	FALSE	TRUE	FALSE	FALSE	NA	NA	FALSE
752	chr3R	13651402	13652441	*	tinc	FALSE	TRUE	FALSE	TRUE	FALSE	FALSE	NA	NA	TRUE
753	chr3R	13906093	13908149	*	CG14317	FALSE	TRUE	FALSE	TRUE	FALSE	FALSE	NA	NA	TRUE
754	chr3R	13995850	13996359	*	PP2A-B'	FALSE	FALSE	FALSE	TRUE	FALSE	FALSE	NA	NA	FALSE
755	chr3R	14008921	14009373	*	cdm	FALSE	FALSE	FALSE	TRUE	FALSE	FALSE	NA	NA	TRUE
756	chr3R	14884492	14885206	*	cdi	TRUE	FALSE	FALSE	FALSE	FALSE	TRUE	NA	NA	FALSE
757	chr3R	14982258	14983113	*	CG42358	FALSE	FALSE	FALSE	TRUE	FALSE	FALSE	NA	NA	TRUE
758	chr3R	15176007	15176666	*	Ino80	FALSE	TRUE	FALSE	TRUE	FALSE	FALSE	NA	NA	TRUE
759	chr3R	15192488	15193130	*	Ino80	FALSE	FALSE	FALSE	FALSE	FALSE	TRUE	NA	hc_55	FALSE
760	chr3R	15756371	15757470	*	Hs6st	FALSE	TRUE	TRUE	FALSE	FALSE	FALSE	NA	NA	TRUE
761	chr3R	16116660	16117482	*	cic	FALSE	FALSE	TRUE	FALSE	FALSE	FALSE	NA	NA	TRUE
762	chr3R	16399257	16401355	*	CG5191	FALSE	TRUE	FALSE	TRUE	FALSE	FALSE	NA	NA	TRUE
763	chr3R	16405471	16405800	*	EloB	FALSE	FALSE	FALSE	TRUE	FALSE	FALSE	NA	NA	FALSE
764	chr3R	16423031	16423800	*	bon	FALSE	FALSE	FALSE	FALSE	TRUE	FALSE	NA	hc_40	TRUE
765	chr3R	16672289	16673062	*	CG15696	FALSE	TRUE	FALSE	TRUE	FALSE	FALSE	NA	NA	TRUE
766	chr3R	16674430	16675737	*	RpS30	FALSE	FALSE	FALSE	FALSE	TRUE	FALSE	NA	NA	TRUE
767	chr3R	16773760	16775317	*	Atpalpha	FALSE	FALSE	FALSE	TRUE	FALSE	FALSE	VT44975	NA	TRUE
768	chr3R	16777142	16778010	*	Atpalpha	FALSE	TRUE	FALSE	TRUE	FALSE	FALSE	NA	NA	TRUE
769	chr3R	16981587	16982792	*	SNF4Agamma	FALSE	FALSE	FALSE	TRUE	FALSE	FALSE	VT45084	NA	FALSE
770	chr3R	17094485	17095159	*	Rab1	FALSE	FALSE	FALSE	TRUE	FALSE	FALSE	NA	NA	FALSE
771	chr3R	17244818	17245822	*	lbe	FALSE	FALSE	FALSE	TRUE	FALSE	FALSE	NA	NA	TRUE
772	chr3R	17273270	17273887	*	lbe	FALSE	FALSE	TRUE	FALSE	FALSE	FALSE	NA	NA	TRUE
773	chr3R	17283853	17284703	*	lbe	FALSE	FALSE	FALSE	FALSE	TRUE	FALSE	VT45233	NA	TRUE
774	chr3R	17307570	17308103	*	lbe	FALSE	FALSE	TRUE	FALSE	FALSE	FALSE	NA	NA	FALSE
775	chr3R	17324808	17325860	*	CG7956	FALSE	FALSE	FALSE	TRUE	FALSE	FALSE	NA	NA	TRUE
776	chr3R	17382584	17383266	*	slou	FALSE	FALSE	FALSE	FALSE	TRUE	FALSE	VT45286	NA	TRUE
777	chr3R	17469467	17470735	*	E2f1	FALSE	TRUE	FALSE	FALSE	FALSE	TRUE	VT45331	NA	TRUE
778	chr3R	17479880	17480372	*	E2f1	TRUE	TRUE	FALSE	TRUE	FALSE	FALSE	NA	NA	TRUE
779	chr3R	17615153	17615715	*	CASK	TRUE	TRUE	FALSE	TRUE	FALSE	FALSE	NA	NA	TRUE
780	chr3R	17959916	17960804	*	SKIP	FALSE	FALSE	TRUE	FALSE	FALSE	FALSE	VT45591	NA	TRUE
781	chr3R	17978364	17979475	*	SKIP	TRUE	TRUE	FALSE	FALSE	TRUE	FALSE	VT45602	NA	TRUE
782	chr3R	18182059	18183023	*	Sar1	FALSE	FALSE	FALSE	TRUE	FALSE	FALSE	NA	NA	FALSE
783	chr3R	18498670	18500810	*	NA	FALSE	TRUE	FALSE	TRUE	FALSE	FALSE	NA	NA	TRUE
784	chr3R	18614684	18615433	*	CG7029	FALSE	TRUE	TRUE	FALSE	FALSE	FALSE	NA	NA	TRUE
785	chr3R	18865305	18865775	*	klg	FALSE	FALSE	TRUE	FALSE	FALSE	FALSE	NA	NA	FALSE
786	chr3R	18882819	18883327	*	CenB1A	FALSE	FALSE	FALSE	FALSE	FALSE	TRUE	NA	hc_47	FALSE
787	chr3R	18955190	18956373	*	hh	FALSE	TRUE	FALSE	FALSE	TRUE	FALSE	NA	NA	TRUE
788	chr3R	19021115	19021931	*	cnc	TRUE	FALSE	FALSE	TRUE	FALSE	FALSE	NA	NA	TRUE
789	chr3R	19026756	19027138	*	cnc	FALSE	FALSE	FALSE	TRUE	FALSE	FALSE	NA	NA	TRUE
790	chr3R	19036817	19037605	*	cnc	TRUE	TRUE	FALSE	FALSE	FALSE	TRUE	NA	NA	TRUE
791	chr3R	19077077	19078233	*	EloA	FALSE	TRUE	FALSE	TRUE	FALSE	FALSE	NA	NA	TRUE
792	chr3R	19140936	19141583	*	pnt	FALSE	TRUE	FALSE	TRUE	FALSE	FALSE	NA	NA	TRUE
793	chr3R	19171129	19172255	*	pnt	FALSE	FALSE	FALSE	TRUE	FALSE	FALSE	VT46222	NA	TRUE
794	chr3R	19554642	19555114	*	Rpn9	FALSE	FALSE	TRUE	FALSE	FALSE	FALSE	NA	NA	FALSE
795	chr3R	19705468	19706428	*	Pli	TRUE	TRUE	FALSE	FALSE	FALSE	TRUE	NA	NA	TRUE
796	chr3R	19711752	19712896	*	Pli	FALSE	TRUE	FALSE	TRUE	FALSE	FALSE	NA	NA	TRUE
797	chr3R	19974975	19976067	*	Slimp	TRUE	TRUE	FALSE	FALSE	FALSE	TRUE	NA	NA	TRUE
798	chr3R	20046467	20048054	*	twin	FALSE	FALSE	FALSE	FALSE	TRUE	FALSE	NA	NA	TRUE
799	chr3R	20078151	20078629	*	CG5706	FALSE	FALSE	FALSE	TRUE	FALSE	FALSE	NA	NA	FALSE
800	chr3R	20096548	20097257	*	jar	FALSE	FALSE	FALSE	TRUE	FALSE	FALSE	NA	NA	FALSE
801	chr3R	20115659	20116149	*	CG6364	FALSE	FALSE	FALSE	TRUE	FALSE	FALSE	NA	NA	FALSE
802	chr3R	20122902	20123994	*	crb	FALSE	TRUE	FALSE	TRUE	FALSE	FALSE	NA	NA	TRUE
803	chr3R	20135058	20135678	*	crb	TRUE	FALSE	FALSE	FALSE	FALSE	TRUE	NA	NA	TRUE
804	chr3R	20411172	20411886	*	mld	FALSE	FALSE	FALSE	TRUE	FALSE	FALSE	NA	NA	FALSE
805	chr3R	20455682	20456238	*	atl	FALSE	FALSE	FALSE	TRUE	FALSE	FALSE	NA	NA	TRUE
806	chr3R	20574701	20576025	*	tok	FALSE	TRUE	FALSE	TRUE	FALSE	FALSE	VT46946	hc_15	TRUE
807	chr3R	20584440	20585826	*	asp	TRUE	FALSE	FALSE	FALSE	FALSE	TRUE	NA	hc_33	TRUE
808	chr3R	20892715	20893635	*	OstStt3	FALSE	TRUE	FALSE	TRUE	FALSE	FALSE	NA	NA	TRUE
809	chr3R	20894829	20895851	*	OstStt3	FALSE	FALSE	FALSE	TRUE	FALSE	FALSE	NA	NA	FALSE
810	chr3R	20960694	20961291	*	danr	TRUE	FALSE	FALSE	TRUE	FALSE	FALSE	VT47148	NA	TRUE
811	chr3R	20997143	20997837	*	dan	TRUE	FALSE	FALSE	FALSE	FALSE	TRUE	VT47167	hc_35	TRUE
812	chr3R	20998561	20999682	*	dan	FALSE	TRUE	FALSE	TRUE	FALSE	FALSE	NA	NA	TRUE
813	chr3R	21006362	21006704	*	dan	TRUE	TRUE	TRUE	FALSE	FALSE	FALSE	NA	NA	TRUE
814	chr3R	21009348	21009902	*	dan	FALSE	FALSE	FALSE	TRUE	FALSE	FALSE	NA	NA	TRUE
815	chr3R	21020384	21021387	*	CG13653	FALSE	TRUE	TRUE	FALSE	FALSE	FALSE	VT47178	NA	TRUE
816	chr3R	21338888	21339558	*	msi	FALSE	FALSE	TRUE	FALSE	FALSE	FALSE	NA	NA	FALSE
817	chr3R	21420993	21421929	*	msi	FALSE	TRUE	FALSE	TRUE	FALSE	FALSE	NA	NA	TRUE
818	chr3R	21457048	21457522	*	Ssadh	TRUE	TRUE	FALSE	FALSE	TRUE	FALSE	VT47407	NA	TRUE
819	chr3R	21458124	21459651	*	jigr1	TRUE	TRUE	FALSE	FALSE	TRUE	FALSE	NA	NA	TRUE
820	chr3R	21461175	21461695	*	jigr1	TRUE	TRUE	FALSE	FALSE	TRUE	FALSE	VT47409	NA	TRUE
821	chr3R	21473603	21474310	*	jigr1	FALSE	FALSE	TRUE	FALSE	FALSE	FALSE	NA	NA	TRUE
822	chr3R	21706696	21707974	*	Tsp96F	FALSE	FALSE	FALSE	TRUE	FALSE	FALSE	NA	NA	FALSE
823	chr3R	21852482	21853284	*	E(spl)m5-HLH	FALSE	FALSE	FALSE	TRUE	FALSE	FALSE	VT47619	NA	TRUE
824	chr3R	22014236	22014842	*	RpL34a	FALSE	FALSE	FALSE	TRUE	FALSE	FALSE	NA	NA	FALSE
825	chr3R	22456784	22457188	*	scrib	TRUE	FALSE	FALSE	TRUE	FALSE	FALSE	NA	NA	TRUE
826	chr3R	22707052	22707695	*	T48	FALSE	FALSE	FALSE	TRUE	FALSE	FALSE	NA	NA	FALSE
827	chr3R	22708419	22708930	*	T48	FALSE	FALSE	FALSE	FALSE	FALSE	TRUE	NA	NA	TRUE
828	chr3R	23101940	23102688	*	CG5938	TRUE	FALSE	FALSE	FALSE	FALSE	TRUE	NA	NA	TRUE
829	chr3R	24372500	24373403	*	fkh	FALSE	FALSE	FALSE	TRUE	FALSE	FALSE	NA	NA	TRUE
830	chr3R	24399956	24400524	*	fkh	FALSE	FALSE	FALSE	FALSE	FALSE	TRUE	NA	NA	TRUE
831	chr3R	24411763	24412461	*	fkh	FALSE	TRUE	FALSE	TRUE	FALSE	FALSE	NA	NA	TRUE
832	chr3R	24422102	24422567	*	Hrb98DE	FALSE	FALSE	FALSE	FALSE	FALSE	TRUE	VT48947	NA	FALSE
833	chr3R	24670139	24671398	*	spg	FALSE	FALSE	FALSE	TRUE	FALSE	FALSE	NA	NA	FALSE
834	chr3R	24713508	24715429	*	NA	FALSE	FALSE	FALSE	TRUE	FALSE	FALSE	NA	NA	TRUE
835	chr3R	24897915	24899208	*	CG11873	TRUE	TRUE	FALSE	FALSE	TRUE	FALSE	NA	NA	TRUE
836	chr3R	24929735	24930459	*	CG11873	FALSE	FALSE	FALSE	FALSE	FALSE	TRUE	NA	NA	FALSE
837	chr3R	25088407	25089649	*	stg	FALSE	FALSE	FALSE	FALSE	FALSE	TRUE	VT49279	NA	TRUE
838	chr3R	25342068	25343267	*	Trc8	TRUE	FALSE	FALSE	FALSE	TRUE	FALSE	NA	NA	TRUE
839	chr3R	25372034	25372548	*	Dr	FALSE	FALSE	FALSE	TRUE	FALSE	FALSE	NA	NA	FALSE
840	chr3R	25866403	25869305	*	Sry-alpha	FALSE	TRUE	FALSE	TRUE	FALSE	FALSE	NA	NA	TRUE
841	chr3R	25871787	25872099	*	RpL32	FALSE	FALSE	FALSE	TRUE	FALSE	FALSE	NA	NA	FALSE
842	chr3R	25982939	25983504	*	CG11498	TRUE	TRUE	FALSE	FALSE	FALSE	TRUE	NA	NA	TRUE
843	chr3R	25987511	25987897	*	CG11498	FALSE	FALSE	FALSE	FALSE	FALSE	TRUE	NA	NA	FALSE
844	chr3R	26253182	26254099	*	CG2218	TRUE	FALSE	FALSE	FALSE	TRUE	FALSE	NA	NA	TRUE
845	chr3R	26257605	26257935	*	CG2218	FALSE	FALSE	FALSE	TRUE	FALSE	FALSE	NA	NA	TRUE
846	chr3R	26284020	26285172	*	CG2224	TRUE	TRUE	FALSE	FALSE	TRUE	FALSE	NA	NA	TRUE
847	chr3R	26292487	26293208	*	PH4alphaEFB	FALSE	FALSE	FALSE	TRUE	FALSE	FALSE	NA	NA	FALSE
848	chr3R	26393872	26394689	*	tmod	FALSE	TRUE	FALSE	FALSE	TRUE	FALSE	NA	NA	TRUE
849	chr3R	26587918	26588554	*	zfh1	FALSE	TRUE	TRUE	FALSE	FALSE	FALSE	NA	NA	TRUE
850	chr3R	26623359	26623995	*	wts	FALSE	FALSE	FALSE	FALSE	FALSE	TRUE	NA	NA	TRUE
851	chr3R	26628762	26630185	*	wts	FALSE	FALSE	FALSE	FALSE	FALSE	TRUE	NA	NA	TRUE
852	chr3R	26631328	26632962	*	wts	FALSE	FALSE	FALSE	TRUE	FALSE	FALSE	NA	NA	TRUE
853	chr3R	26674860	26676273	*	tll	FALSE	TRUE	TRUE	FALSE	FALSE	FALSE	NA	hc_7	TRUE
854	chr3R	26676539	26677052	*	tll	FALSE	FALSE	FALSE	FALSE	FALSE	TRUE	NA	NA	TRUE
855	chr3R	26681004	26681451	*	tll	FALSE	FALSE	FALSE	FALSE	TRUE	FALSE	VT50157	NA	TRUE
856	chr3R	26681670	26682775	*	tll	TRUE	TRUE	FALSE	FALSE	FALSE	TRUE	NA	NA	TRUE
857	chr3R	26690909	26691942	*	tll	FALSE	FALSE	FALSE	FALSE	FALSE	TRUE	VT50163	NA	TRUE
858	chr3R	27018220	27021114	*	bnk	FALSE	TRUE	TRUE	FALSE	FALSE	FALSE	NA	hc_22	TRUE
859	chr3R	27048232	27049620	*	CG12054	FALSE	TRUE	FALSE	FALSE	TRUE	FALSE	NA	NA	TRUE
860	chr3R	27353367	27354020	*	gammaCOP	FALSE	FALSE	TRUE	FALSE	FALSE	FALSE	NA	NA	TRUE
861	chr3R	27530435	27531077	*	ttk	FALSE	FALSE	FALSE	TRUE	FALSE	FALSE	NA	NA	TRUE
862	chr3R	27597783	27598748	*	sip3	FALSE	FALSE	FALSE	TRUE	FALSE	FALSE	NA	NA	FALSE
863	chr3R	27668082	27668573	*	heph	FALSE	FALSE	FALSE	TRUE	FALSE	FALSE	NA	NA	FALSE
864	chr4	64168	64685	*	PlexB	FALSE	FALSE	FALSE	TRUE	FALSE	FALSE	VT51446	NA	FALSE
865	chr4	152472	153274	*	CG32000	FALSE	FALSE	FALSE	TRUE	FALSE	FALSE	NA	NA	FALSE
866	chr4	214073	214881	*	CG2316	FALSE	FALSE	TRUE	FALSE	FALSE	FALSE	NA	NA	FALSE
867	chr4	683457	684423	*	Slip1	FALSE	FALSE	FALSE	TRUE	FALSE	FALSE	NA	NA	FALSE
868	chr4	690897	692174	*	CG11360	FALSE	FALSE	FALSE	TRUE	FALSE	FALSE	NA	NA	TRUE
869	chr4	717238	718414	*	myo	FALSE	FALSE	FALSE	TRUE	FALSE	FALSE	VT51754	NA	FALSE
870	chr4	866700	867287	*	CG11148	FALSE	FALSE	FALSE	TRUE	FALSE	FALSE	NA	NA	TRUE
871	chr4	871700	872165	*	CG11148	FALSE	FALSE	FALSE	TRUE	FALSE	FALSE	NA	NA	TRUE
872	chr4	877703	878166	*	CG11148	FALSE	FALSE	FALSE	FALSE	FALSE	TRUE	NA	NA	FALSE
873	chr4	887373	888012	*	CG11148	FALSE	FALSE	FALSE	TRUE	FALSE	FALSE	NA	NA	FALSE
874	chr4	1014090	1014714	*	toy	FALSE	FALSE	FALSE	FALSE	FALSE	TRUE	NA	NA	TRUE
875	chr4	1047417	1048274	*	PlexA	FALSE	FALSE	FALSE	TRUE	FALSE	FALSE	NA	NA	FALSE
876	chr4	1178845	1179485	*	pho	FALSE	FALSE	FALSE	TRUE	FALSE	FALSE	NA	NA	FALSE
877	chrX	275726	276266	*	ac	TRUE	TRUE	FALSE	TRUE	FALSE	FALSE	VT54805	NA	TRUE
878	chrX	293613	294694	*	sc	FALSE	FALSE	FALSE	TRUE	FALSE	FALSE	VT54815	NA	TRUE
879	chrX	470248	470768	*	vnd	TRUE	FALSE	FALSE	TRUE	FALSE	FALSE	NA	NA	TRUE
880	chrX	476906	477376	*	vnd	FALSE	FALSE	FALSE	TRUE	FALSE	FALSE	VT54905	NA	FALSE
881	chrX	477947	478650	*	vnd	FALSE	FALSE	FALSE	TRUE	FALSE	FALSE	VT54905	NA	TRUE
882	chrX	486342	487460	*	vnd	FALSE	TRUE	FALSE	FALSE	TRUE	FALSE	VT54910	hc_32	TRUE
883	chrX	549572	550798	*	Hmt4-20	FALSE	FALSE	FALSE	TRUE	FALSE	FALSE	NA	NA	FALSE
884	chrX	611063	611604	*	sdk	FALSE	FALSE	FALSE	FALSE	TRUE	FALSE	NA	NA	FALSE
885	chrX	668217	668828	*	fz3	FALSE	FALSE	TRUE	FALSE	FALSE	FALSE	NA	NA	TRUE
886	chrX	1235524	1236536	*	CG11412	FALSE	TRUE	FALSE	TRUE	FALSE	FALSE	NA	NA	FALSE
887	chrX	1377080	1377931	*	sta	FALSE	FALSE	FALSE	TRUE	FALSE	FALSE	NA	NA	FALSE
888	chrX	1406781	1407287	*	sta	FALSE	FALSE	FALSE	TRUE	FALSE	FALSE	NA	NA	FALSE
889	chrX	1717414	1718935	*	CG42666	FALSE	FALSE	FALSE	TRUE	FALSE	FALSE	NA	NA	TRUE
890	chrX	2019428	2019926	*	ph-p	FALSE	FALSE	FALSE	TRUE	FALSE	FALSE	VT55651	NA	TRUE
891	chrX	2036145	2036759	*	CG3835	FALSE	FALSE	FALSE	TRUE	FALSE	FALSE	NA	NA	TRUE
892	chrX	2039912	2040703	*	CG3835	TRUE	FALSE	FALSE	FALSE	TRUE	FALSE	NA	NA	TRUE
893	chrX	2043349	2043816	*	bcn92	FALSE	TRUE	FALSE	TRUE	FALSE	FALSE	NA	NA	TRUE
894	chrX	2140708	2141010	*	Or2a	FALSE	FALSE	TRUE	FALSE	FALSE	FALSE	NA	NA	FALSE
895	chrX	2164480	2165086	*	CG2924	FALSE	TRUE	TRUE	FALSE	FALSE	FALSE	NA	NA	FALSE
896	chrX	2190118	2190558	*	phl	FALSE	FALSE	FALSE	TRUE	FALSE	FALSE	NA	NA	TRUE
897	chrX	2280602	2281327	*	PsGEF	FALSE	TRUE	FALSE	TRUE	FALSE	FALSE	NA	NA	TRUE
898	chrX	2293576	2293997	*	CG12496	FALSE	FALSE	TRUE	FALSE	FALSE	FALSE	NA	NA	TRUE
899	chrX	2302690	2303063	*	CG12496	TRUE	FALSE	FALSE	TRUE	FALSE	FALSE	NA	NA	TRUE
900	chrX	2323816	2325615	*	gt	FALSE	FALSE	TRUE	FALSE	FALSE	FALSE	NA	hc_38	TRUE
901	chrX	2328070	2328808	*	gt	FALSE	FALSE	FALSE	FALSE	FALSE	TRUE	NA	NA	TRUE
902	chrX	2332140	2333373	*	tko	TRUE	TRUE	FALSE	FALSE	TRUE	FALSE	VT55795	NA	TRUE
903	chrX	2684035	2687274	*	w	FALSE	TRUE	TRUE	FALSE	FALSE	FALSE	NA	NA	FALSE
904	chrX	3028605	3029967	*	N	FALSE	TRUE	FALSE	TRUE	FALSE	FALSE	NA	NA	TRUE
905	chrX	3242436	3243405	*	dnc	TRUE	FALSE	FALSE	TRUE	FALSE	FALSE	NA	NA	TRUE
906	chrX	3290565	3291424	*	dm	FALSE	FALSE	FALSE	TRUE	FALSE	FALSE	NA	NA	TRUE
907	chrX	3291613	3292547	*	dm	FALSE	FALSE	FALSE	FALSE	TRUE	FALSE	NA	NA	TRUE
908	chrX	3573983	3574416	*	Mnt	FALSE	FALSE	FALSE	TRUE	FALSE	FALSE	NA	NA	FALSE
909	chrX	3731753	3732395	*	ec	FALSE	TRUE	FALSE	TRUE	FALSE	FALSE	NA	NA	TRUE
910	chrX	3735698	3736384	*	ec	FALSE	FALSE	FALSE	TRUE	FALSE	FALSE	NA	NA	TRUE
911	chrX	3755089	3756398	*	roX1	FALSE	FALSE	TRUE	FALSE	FALSE	FALSE	NA	NA	TRUE
912	chrX	3763049	3763545	*	CG2930	FALSE	FALSE	TRUE	FALSE	FALSE	FALSE	NA	NA	TRUE
913	chrX	4002483	4003414	*	cib	FALSE	TRUE	FALSE	TRUE	FALSE	FALSE	NA	NA	FALSE
914	chrX	4318808	4319508	*	bi	FALSE	TRUE	FALSE	TRUE	FALSE	FALSE	VT56773	NA	FALSE
915	chrX	4350339	4351224	*	bi	TRUE	TRUE	FALSE	FALSE	FALSE	TRUE	VT56791	NA	TRUE
916	chrX	4936401	4936830	*	ovo	FALSE	FALSE	TRUE	FALSE	FALSE	FALSE	VT57075	NA	FALSE
917	chrX	4946583	4947283	*	ovo	FALSE	FALSE	FALSE	TRUE	FALSE	FALSE	NA	NA	TRUE
918	chrX	5531483	5532079	*	CG42265	FALSE	FALSE	FALSE	FALSE	TRUE	FALSE	NA	NA	FALSE
919	chrX	5568541	5569376	*	Tre1	TRUE	TRUE	FALSE	FALSE	TRUE	FALSE	NA	NA	TRUE
920	chrX	5583424	5584576	*	CG3160	FALSE	FALSE	FALSE	TRUE	FALSE	FALSE	NA	NA	TRUE
921	chrX	5631802	5632394	*	CG32758	FALSE	TRUE	FALSE	TRUE	FALSE	FALSE	NA	NA	FALSE
922	chrX	5931092	5932265	*	CG5941	FALSE	FALSE	FALSE	TRUE	FALSE	FALSE	NA	NA	FALSE
923	chrX	6181686	6182445	*	wuho	FALSE	TRUE	FALSE	TRUE	FALSE	FALSE	NA	NA	FALSE
924	chrX	6418177	6418635	*	CG42340	FALSE	FALSE	FALSE	TRUE	FALSE	FALSE	NA	NA	FALSE
925	chrX	6638068	6638699	*	RpL17	FALSE	FALSE	TRUE	FALSE	FALSE	FALSE	NA	NA	FALSE
926	chrX	6716644	6717510	*	Atx-1	FALSE	FALSE	TRUE	FALSE	FALSE	FALSE	NA	NA	TRUE
927	chrX	6749590	6750146	*	CG43736	FALSE	FALSE	FALSE	TRUE	FALSE	FALSE	NA	NA	TRUE
928	chrX	6755453	6756105	*	CG43736	FALSE	FALSE	FALSE	TRUE	FALSE	FALSE	NA	NA	TRUE
929	chrX	6933935	6935897	*	CG14427	FALSE	FALSE	TRUE	FALSE	FALSE	FALSE	NA	NA	TRUE
930	chrX	6938544	6939375	*	CG14427	FALSE	TRUE	FALSE	FALSE	FALSE	TRUE	NA	NA	TRUE
931	chrX	6943050	6943741	*	nullo	FALSE	FALSE	TRUE	FALSE	FALSE	FALSE	NA	NA	TRUE
932	chrX	6952979	6953531	*	nullo	FALSE	FALSE	FALSE	FALSE	FALSE	TRUE	NA	NA	TRUE
933	chrX	6991771	6992373	*	Sxl	FALSE	TRUE	FALSE	TRUE	FALSE	FALSE	NA	NA	FALSE
934	chrX	7160021	7160748	*	CG1677	TRUE	FALSE	FALSE	FALSE	FALSE	TRUE	NA	hc_58	TRUE
935	chrX	7190719	7191529	*	CG1677	FALSE	TRUE	FALSE	TRUE	FALSE	FALSE	VT58195	NA	TRUE
936	chrX	7214151	7215333	*	CG1677	FALSE	TRUE	FALSE	TRUE	FALSE	FALSE	NA	NA	TRUE
937	chrX	7415948	7416408	*	CG1677	FALSE	FALSE	FALSE	TRUE	FALSE	FALSE	NA	NA	FALSE
938	chrX	7785348	7787385	*	Nek2	FALSE	TRUE	FALSE	TRUE	FALSE	FALSE	NA	NA	TRUE
939	chrX	7861030	7861589	*	sws	FALSE	TRUE	FALSE	TRUE	FALSE	FALSE	VT58539	NA	FALSE
940	chrX	7954838	7955992	*	fs(1)h	FALSE	FALSE	FALSE	FALSE	TRUE	FALSE	NA	NA	TRUE
941	chrX	8109147	8109714	*	sdt	FALSE	FALSE	FALSE	TRUE	FALSE	FALSE	NA	NA	TRUE
942	chrX	8306451	8307319	*	Trf2	FALSE	TRUE	FALSE	TRUE	FALSE	FALSE	NA	NA	TRUE
943	chrX	8331480	8332323	*	CG1440	FALSE	FALSE	FALSE	TRUE	FALSE	FALSE	NA	NA	TRUE
944	chrX	8500135	8500862	*	Caf1-180	FALSE	FALSE	FALSE	TRUE	FALSE	FALSE	NA	NA	FALSE
945	chrX	8537214	8537948	*	oc	TRUE	TRUE	FALSE	FALSE	FALSE	TRUE	NA	NA	TRUE
946	chrX	8547624	8548331	*	oc	FALSE	FALSE	FALSE	FALSE	TRUE	FALSE	NA	NA	TRUE
947	chrX	8548446	8549082	*	oc	FALSE	FALSE	FALSE	FALSE	FALSE	TRUE	NA	NA	TRUE
948	chrX	8549156	8549666	*	oc	FALSE	FALSE	FALSE	FALSE	FALSE	TRUE	VT58874	NA	TRUE
949	chrX	8670108	8671693	*	Lim1	FALSE	FALSE	FALSE	FALSE	FALSE	TRUE	VT58939	NA	TRUE
950	chrX	8722873	8723959	*	Lim1	TRUE	TRUE	FALSE	FALSE	FALSE	TRUE	NA	NA	TRUE
951	chrX	8724579	8726356	*	Lim1	FALSE	TRUE	FALSE	FALSE	TRUE	FALSE	NA	NA	TRUE
952	chrX	8936141	8936919	*	CG42388	FALSE	TRUE	FALSE	FALSE	TRUE	FALSE	NA	NA	TRUE
953	chrX	9021300	9022293	*	fend	FALSE	TRUE	FALSE	FALSE	TRUE	FALSE	NA	NA	TRUE
954	chrX	9188185	9188968	*	c11.1	FALSE	TRUE	FALSE	TRUE	FALSE	FALSE	NA	hc_54	FALSE
955	chrX	9389503	9390661	*	mgl	FALSE	TRUE	FALSE	TRUE	FALSE	FALSE	NA	NA	TRUE
956	chrX	9390775	9391699	*	mgl	FALSE	FALSE	FALSE	TRUE	FALSE	FALSE	NA	NA	TRUE
957	chrX	9581658	9582147	*	nej	FALSE	FALSE	FALSE	TRUE	FALSE	FALSE	NA	NA	FALSE
958	chrX	9584164	9585669	*	btd	FALSE	FALSE	FALSE	FALSE	FALSE	TRUE	NA	NA	TRUE
959	chrX	9637822	9638782	*	CG1354	FALSE	TRUE	FALSE	FALSE	TRUE	FALSE	NA	NA	FALSE
960	chrX	9982987	9984223	*	RhoU	FALSE	FALSE	FALSE	TRUE	FALSE	FALSE	NA	NA	TRUE
961	chrX	10259711	10260617	*	l(1)G0289	FALSE	FALSE	FALSE	TRUE	FALSE	FALSE	NA	NA	FALSE
962	chrX	10387315	10388269	*	spri	FALSE	FALSE	FALSE	TRUE	FALSE	FALSE	NA	NA	TRUE
963	chrX	10657861	10658615	*	Tango5	FALSE	FALSE	FALSE	FALSE	TRUE	FALSE	NA	NA	TRUE
964	chrX	10705071	10705620	*	Imp	FALSE	TRUE	FALSE	FALSE	TRUE	FALSE	NA	NA	FALSE
965	chrX	11215763	11217411	*	sisA	FALSE	FALSE	FALSE	TRUE	FALSE	FALSE	NA	hc_13	TRUE
966	chrX	11479080	11479600	*	nod	TRUE	TRUE	FALSE	FALSE	TRUE	FALSE	NA	NA	TRUE
967	chrX	11572782	11573488	*	bif	FALSE	TRUE	FALSE	TRUE	FALSE	FALSE	NA	NA	FALSE
968	chrX	11588864	11589632	*	PhKgamma	FALSE	FALSE	FALSE	TRUE	FALSE	FALSE	NA	NA	TRUE
969	chrX	11593220	11594140	*	PhKgamma	FALSE	TRUE	FALSE	TRUE	FALSE	FALSE	NA	hc_76	FALSE
970	chrX	11597083	11597460	*	PhKgamma	FALSE	TRUE	FALSE	TRUE	FALSE	FALSE	NA	NA	FALSE
971	chrX	11609776	11611253	*	prtp	FALSE	FALSE	FALSE	TRUE	FALSE	FALSE	NA	NA	TRUE
972	chrX	11882650	11883527	*	tsg	FALSE	FALSE	TRUE	FALSE	FALSE	FALSE	NA	NA	TRUE
973	chrX	11911757	11913388	*	CG15735	FALSE	FALSE	FALSE	TRUE	FALSE	FALSE	NA	NA	FALSE
974	chrX	11917905	11918534	*	Usp7	FALSE	FALSE	FALSE	TRUE	FALSE	FALSE	NA	NA	FALSE
975	chrX	12509788	12510540	*	CG2543	FALSE	TRUE	FALSE	FALSE	TRUE	FALSE	NA	NA	TRUE
976	chrX	13121485	13122386	*	mew	FALSE	TRUE	FALSE	TRUE	FALSE	FALSE	NA	NA	TRUE
977	chrX	13281133	13282006	*	Yippee	FALSE	FALSE	FALSE	TRUE	FALSE	FALSE	NA	NA	FALSE
978	chrX	13678063	13679093	*	CtsB1	FALSE	FALSE	FALSE	FALSE	TRUE	FALSE	NA	NA	TRUE
979	chrX	14141117	14144131	*	mud	FALSE	FALSE	FALSE	TRUE	FALSE	FALSE	NA	NA	TRUE
980	chrX	14901783	14902176	*	hiw	FALSE	TRUE	FALSE	TRUE	FALSE	FALSE	VT62055	NA	FALSE
981	chrX	15518107	15519187	*	sog	FALSE	FALSE	FALSE	TRUE	FALSE	FALSE	NA	hc_42	TRUE
982	chrX	15540696	15541673	*	sog	FALSE	FALSE	FALSE	TRUE	FALSE	FALSE	NA	NA	TRUE
983	chrX	15578159	15579014	*	CG12708	FALSE	TRUE	FALSE	FALSE	FALSE	TRUE	NA	NA	TRUE
984	chrX	15587229	15587711	*	CG8128	FALSE	FALSE	FALSE	FALSE	FALSE	TRUE	NA	NA	TRUE
985	chrX	15650173	15651123	*	Graf	FALSE	TRUE	FALSE	FALSE	FALSE	TRUE	NA	NA	FALSE
986	chrX	15838737	15839384	*	Rrp47	FALSE	TRUE	FALSE	TRUE	FALSE	FALSE	NA	NA	TRUE
987	chrX	15967335	15968171	*	Nipsnap	FALSE	TRUE	FALSE	TRUE	FALSE	FALSE	NA	NA	FALSE
988	chrX	16135538	16136640	*	disco	TRUE	TRUE	FALSE	FALSE	TRUE	FALSE	NA	NA	TRUE
989	chrX	16446783	16447504	*	Arp2	FALSE	FALSE	FALSE	FALSE	TRUE	FALSE	NA	NA	FALSE
990	chrX	16502711	16503601	*	Nup153	TRUE	FALSE	FALSE	FALSE	FALSE	TRUE	NA	NA	TRUE
991	chrX	16733835	16734322	*	CG13003	FALSE	FALSE	FALSE	TRUE	FALSE	FALSE	NA	NA	TRUE
992	chrX	16842294	16842851	*	CG13000	FALSE	TRUE	FALSE	FALSE	FALSE	TRUE	NA	NA	TRUE
993	chrX	16851395	16852064	*	CG9086	TRUE	FALSE	FALSE	TRUE	FALSE	FALSE	NA	NA	TRUE
994	chrX	17073591	17074084	*	baz	FALSE	FALSE	TRUE	FALSE	FALSE	FALSE	NA	NA	TRUE
995	chrX	17246966	17247390	*	B-H2	FALSE	FALSE	FALSE	TRUE	FALSE	FALSE	VT63200	NA	FALSE
996	chrX	17375937	17376262	*	CG43658	FALSE	TRUE	TRUE	FALSE	FALSE	FALSE	NA	NA	FALSE
997	chrX	17631992	17633428	*	CG42684	FALSE	TRUE	FALSE	TRUE	FALSE	FALSE	NA	NA	TRUE
998	chrX	17713635	17714243	*	CG12986	FALSE	TRUE	TRUE	FALSE	FALSE	FALSE	NA	NA	TRUE
999	chrX	17714318	17714731	*	Socs16D	FALSE	FALSE	TRUE	FALSE	FALSE	FALSE	NA	NA	FALSE
1000	chrX	17721010	17721989	*	Socs16D	FALSE	FALSE	FALSE	TRUE	FALSE	FALSE	NA	NA	TRUE
1001	chrX	17723312	17724491	*	CG6398	FALSE	FALSE	FALSE	TRUE	FALSE	FALSE	NA	NA	TRUE
1002	chrX	17781022	17781889	*	mnb	FALSE	TRUE	FALSE	TRUE	FALSE	FALSE	NA	NA	FALSE
1003	chrX	18197567	18199003	*	os	FALSE	FALSE	FALSE	TRUE	FALSE	FALSE	VT63713	hc_6	TRUE
1004	chrX	18580167	18580593	*	phm	FALSE	FALSE	FALSE	TRUE	FALSE	FALSE	NA	NA	TRUE
1005	chrX	18683999	18684620	*	Pk17E	FALSE	FALSE	FALSE	TRUE	FALSE	FALSE	NA	NA	TRUE
1006	chrX	18693273	18694011	*	Pk17E	FALSE	FALSE	FALSE	TRUE	FALSE	FALSE	NA	NA	TRUE
1007	chrX	18737320	18738271	*	CG34422	FALSE	TRUE	FALSE	TRUE	FALSE	FALSE	NA	NA	TRUE
1008	chrX	18785286	18786327	*	CG7358	FALSE	TRUE	TRUE	FALSE	FALSE	FALSE	NA	NA	TRUE
1009	chrX	18824872	18825359	*	CG43759	FALSE	TRUE	FALSE	TRUE	FALSE	FALSE	NA	NA	TRUE
1010	chrX	19459664	19460510	*	car	FALSE	TRUE	FALSE	TRUE	FALSE	FALSE	NA	NA	TRUE
1011	chrX	19516700	19517529	*	Tim9b	FALSE	FALSE	FALSE	TRUE	FALSE	FALSE	NA	NA	FALSE
1012	chrX	19532041	19533197	*	e(y)3	FALSE	TRUE	FALSE	TRUE	FALSE	FALSE	NA	NA	FALSE
1013	chrX	19576624	19578019	*	dome	FALSE	FALSE	FALSE	FALSE	TRUE	FALSE	NA	NA	TRUE
1014	chrX	19658746	19659441	*	vfl	FALSE	FALSE	FALSE	TRUE	FALSE	FALSE	NA	NA	FALSE
1015	chrX	19986027	19986993	*	fd19B	TRUE	FALSE	FALSE	FALSE	FALSE	TRUE	NA	NA	TRUE
1016	chrX	20264667	20265645	*	HERC2	FALSE	FALSE	FALSE	TRUE	FALSE	FALSE	NA	NA	FALSE
1017	chrX	20381439	20381972	*	RhoGAP19D	FALSE	FALSE	FALSE	TRUE	FALSE	FALSE	NA	NA	TRUE
1018	chrX	20550996	20552082	*	run	FALSE	FALSE	FALSE	FALSE	FALSE	TRUE	NA	hc_16	TRUE
1019	chrX	20562114	20563116	*	run	FALSE	FALSE	FALSE	TRUE	FALSE	FALSE	NA	hc_36	TRUE
1020	chrX	20563502	20563969	*	run	FALSE	FALSE	FALSE	FALSE	TRUE	FALSE	NA	NA	TRUE
1021	chrX	20584335	20584917	*	run	FALSE	FALSE	FALSE	FALSE	FALSE	TRUE	VT64919	NA	TRUE
1022	chrX	20606949	20607666	*	CG1324	FALSE	TRUE	TRUE	FALSE	FALSE	FALSE	NA	NA	TRUE
1023	chrX	20617860	20618646	*	CG1324	FALSE	TRUE	FALSE	FALSE	TRUE	FALSE	NA	NA	TRUE
1024	chrX	20906207	20906879	*	Ntf-2	FALSE	FALSE	FALSE	TRUE	FALSE	FALSE	NA	NA	FALSE
1025	chrX	21102800	21103268	*	CG1718	FALSE	TRUE	FALSE	TRUE	FALSE	FALSE	NA	NA	FALSE
1026	chrX	21856747	21858813	*	NA	FALSE	TRUE	FALSE	TRUE	FALSE	FALSE	NA	NA	TRUE
1027	chrX	22394120	22394612	*	CG13865	FALSE	FALSE	TRUE	FALSE	FALSE	FALSE	NA	NA	TRUE
