# Supplementary figures and images for: Concentration dependent chromatin states induced by the bicoid morphogen gradient
Source: eLife journal article supplement (doi:10.7554/elife.28275), 2017-09-11

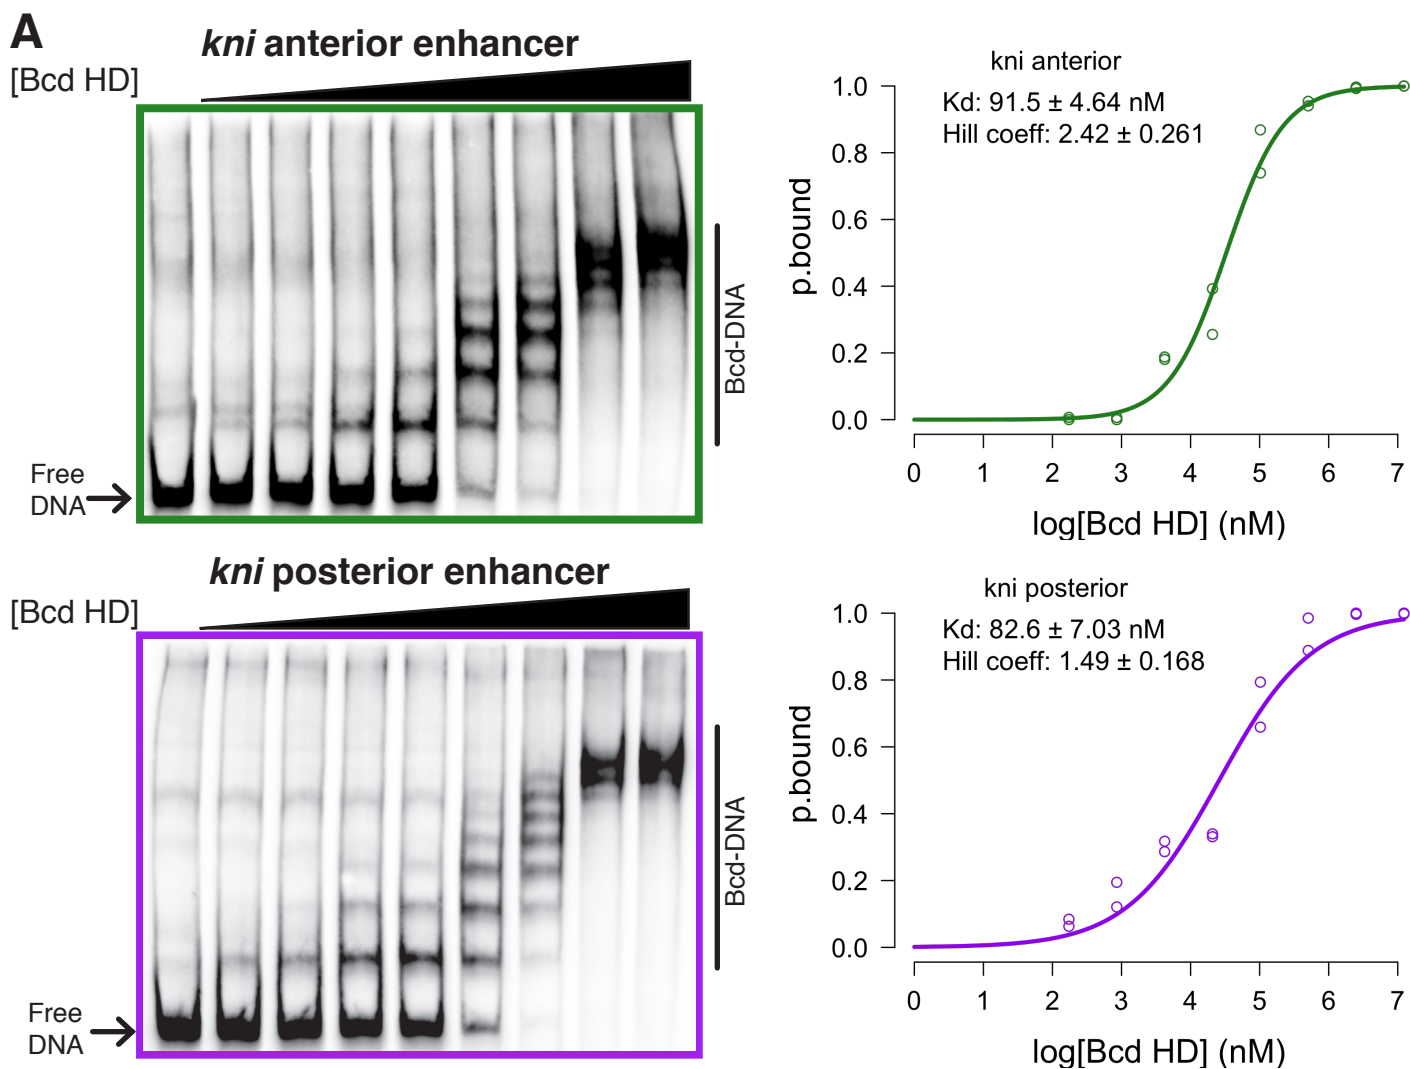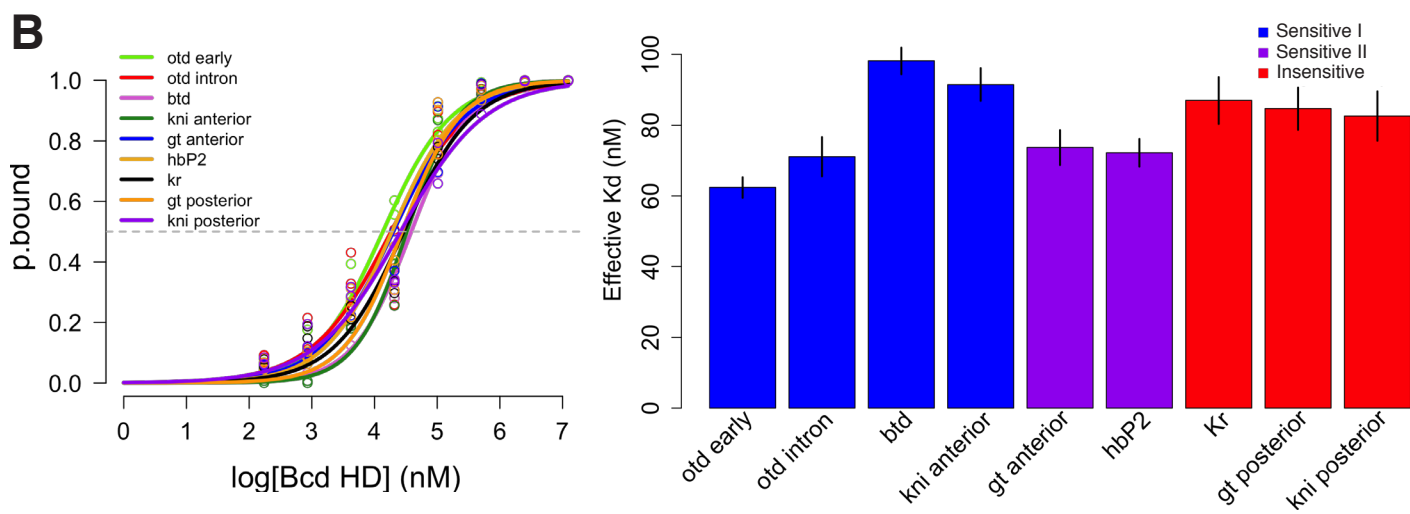

Supplement: supp [file elife-28275-supp-v1.zip]

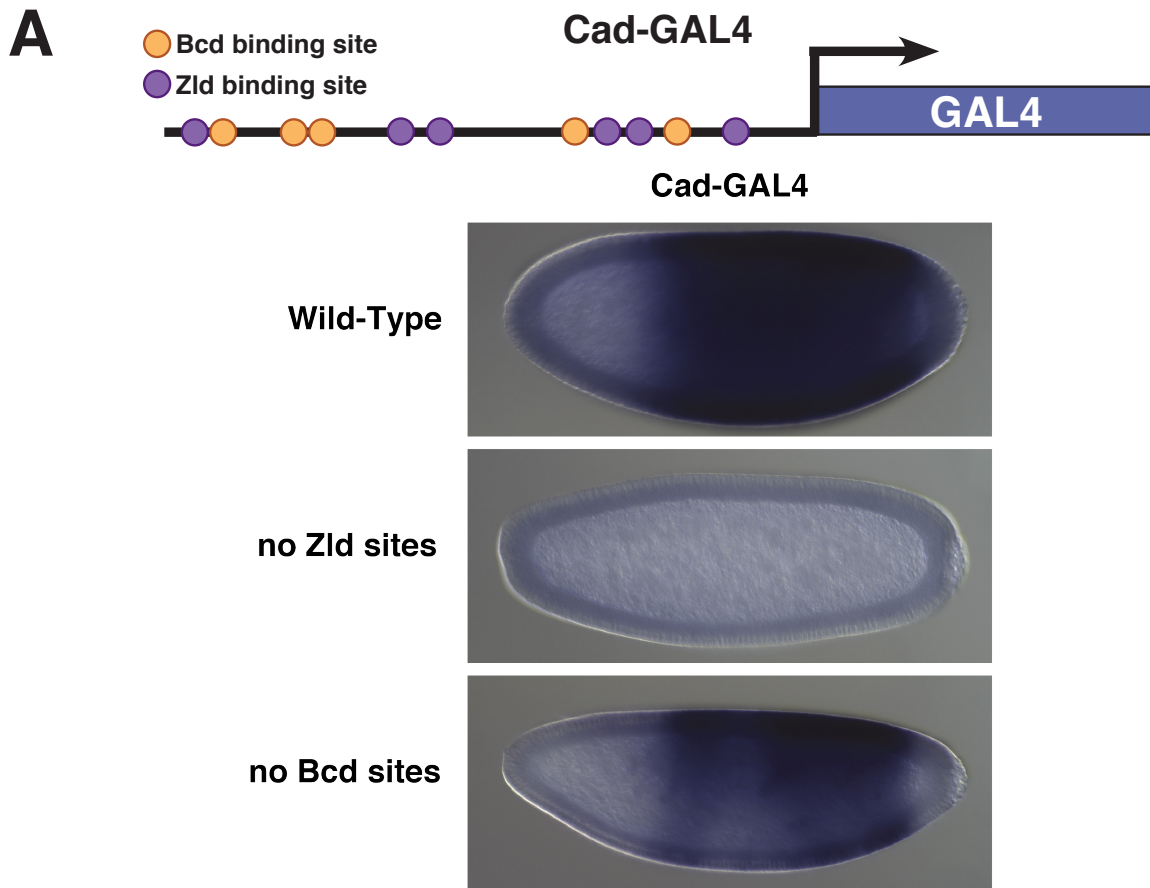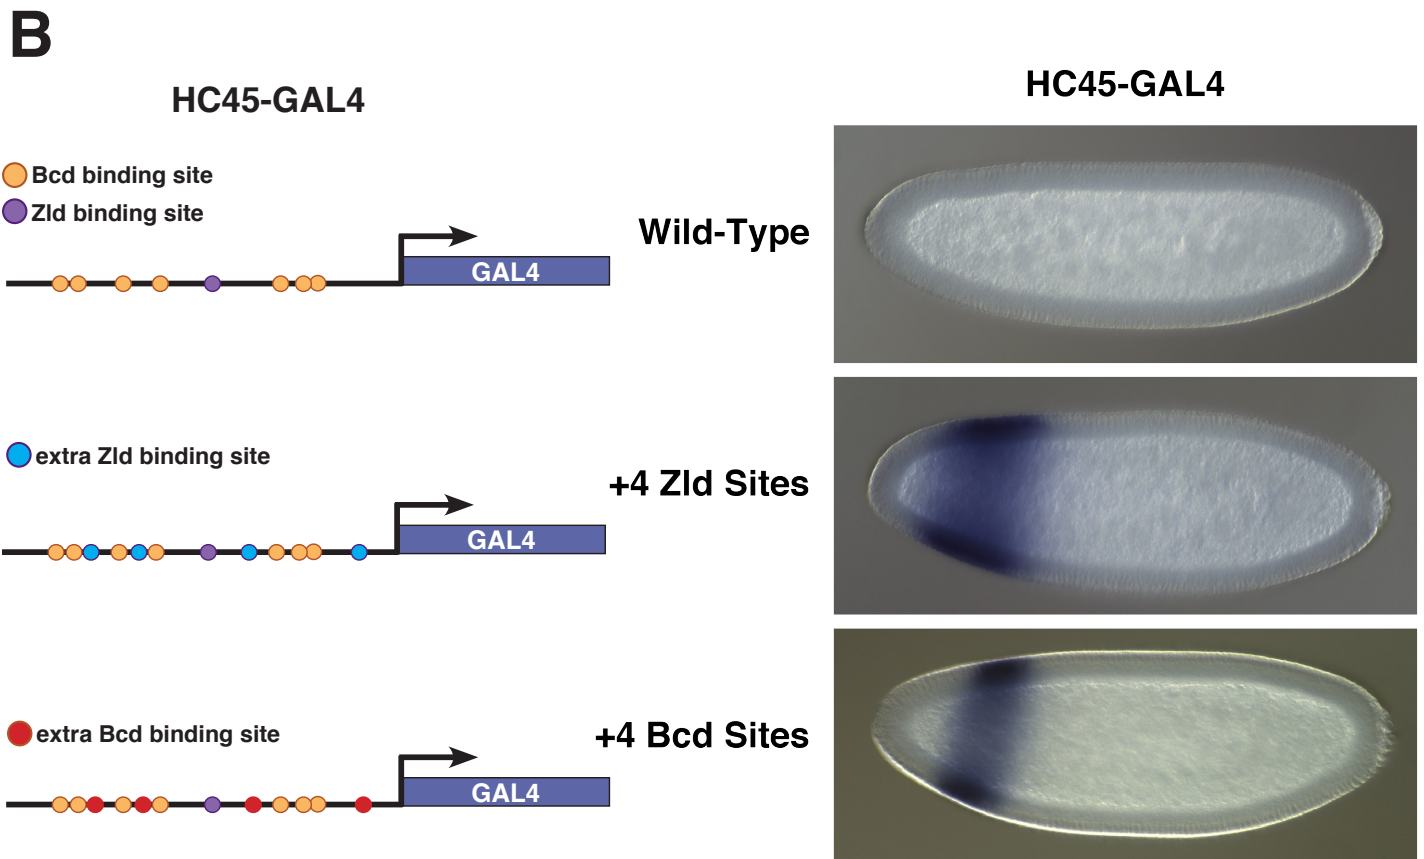

Supplement: supp [file elife-28275-supp-v1.zip]

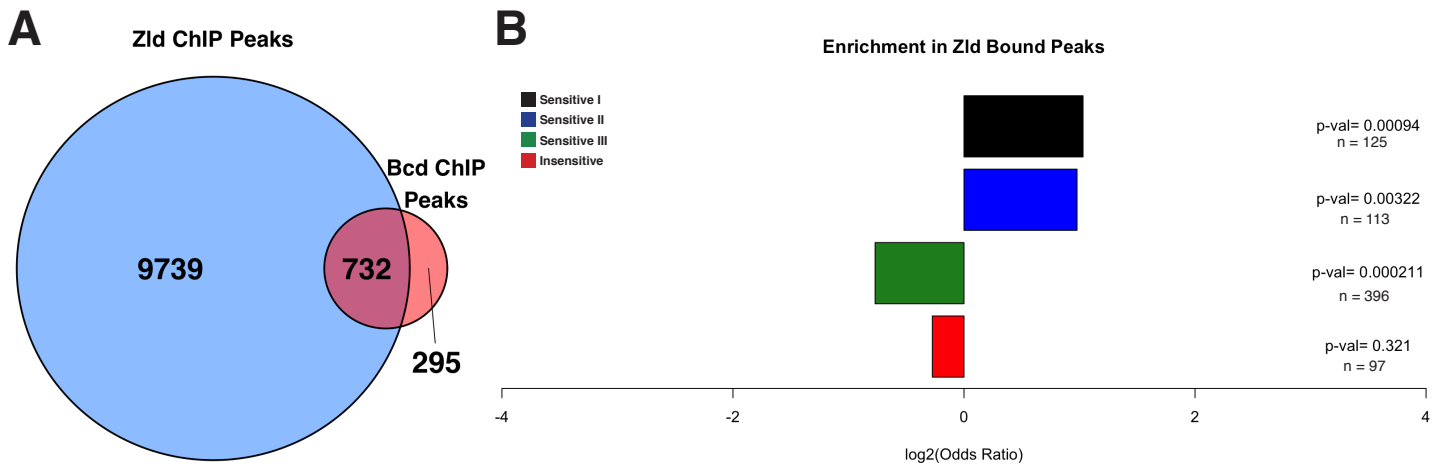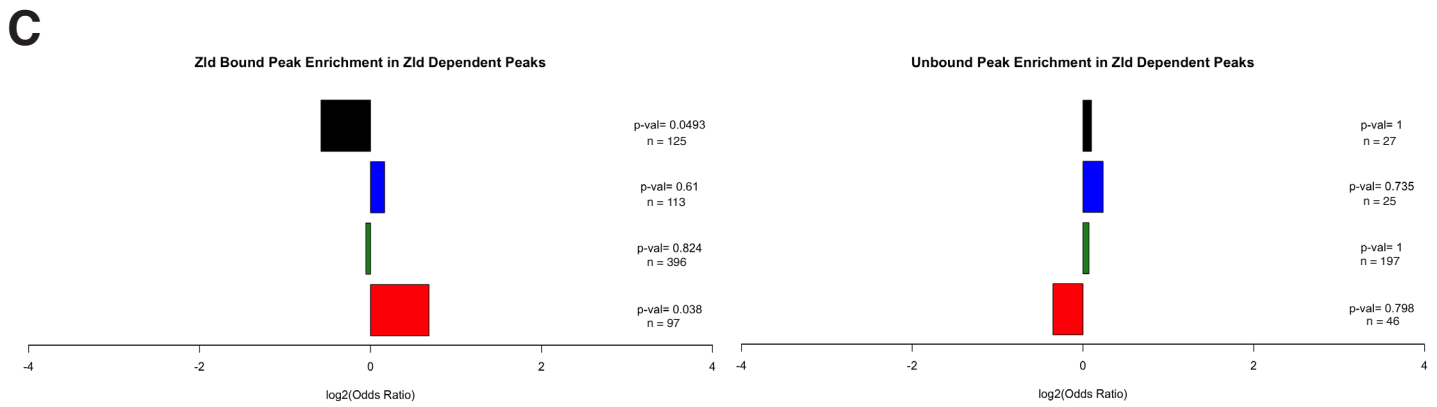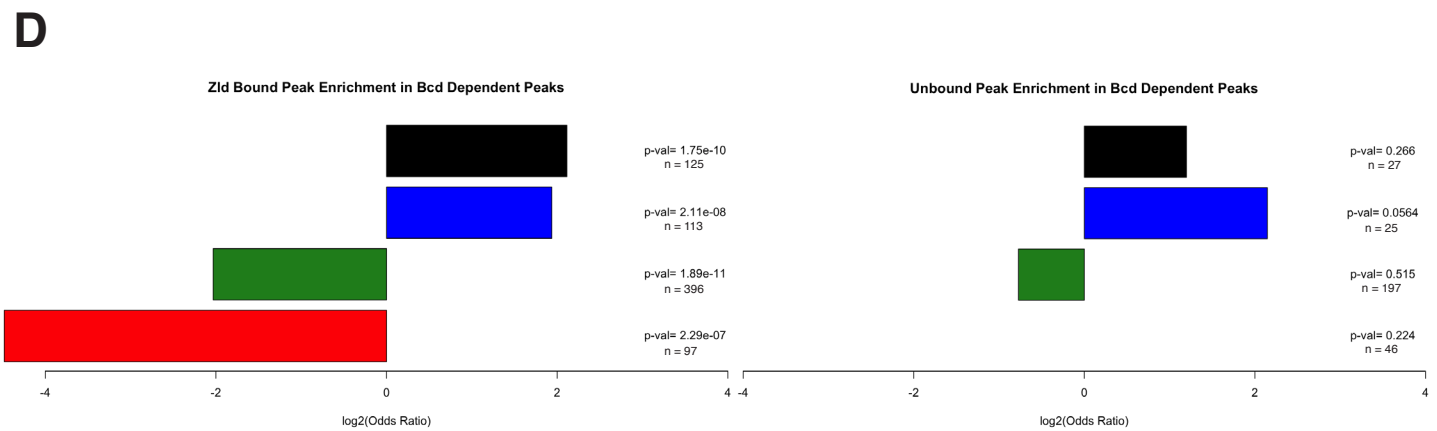

Supplement: supp [file elife-28275-supp-v1.zip]

**A**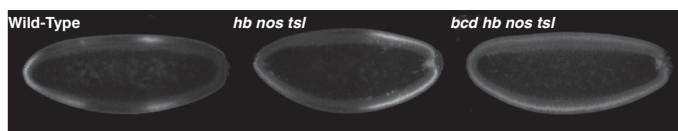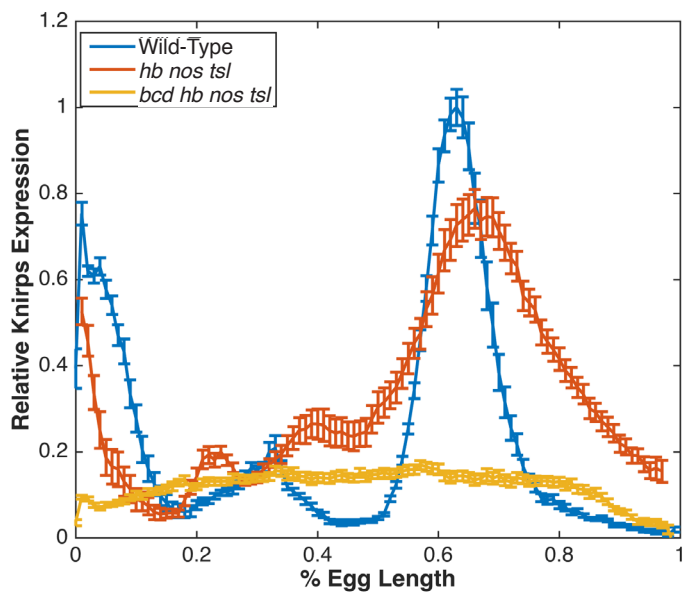**B**

*GFP-Bcd;;bcd<sup>E1</sup>* vs. *GFP-Bcd;;bnt* Tagwise

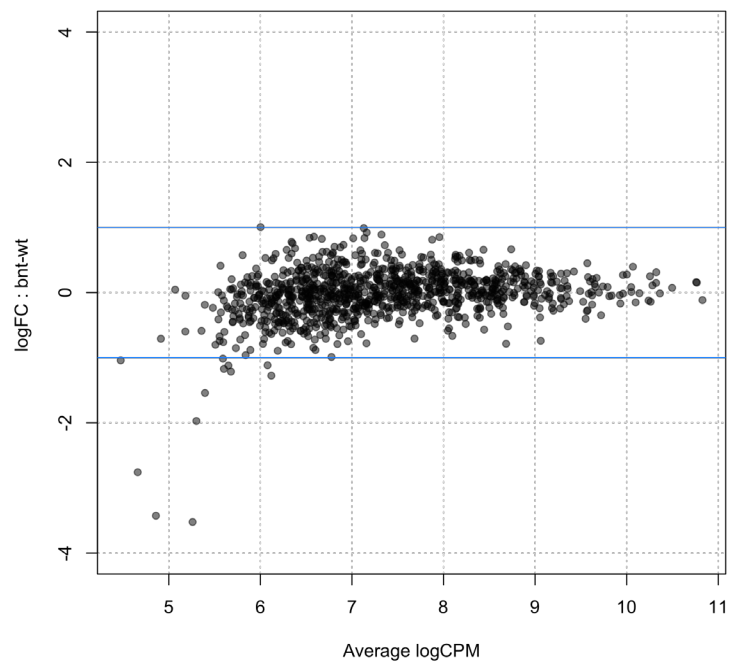**C**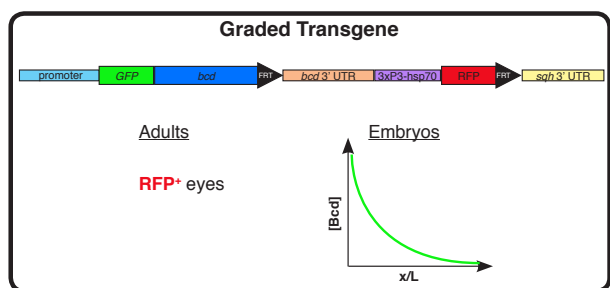

x *hsFLP*  
heat shock

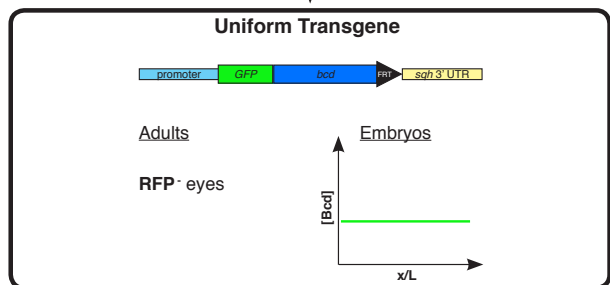**D**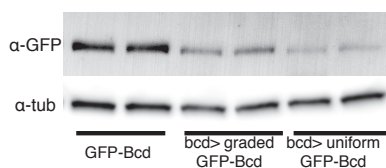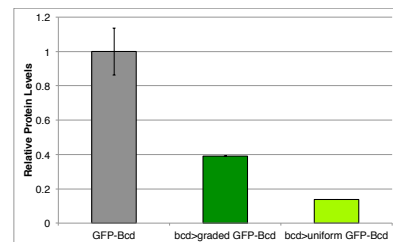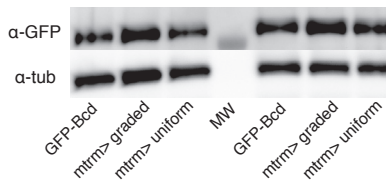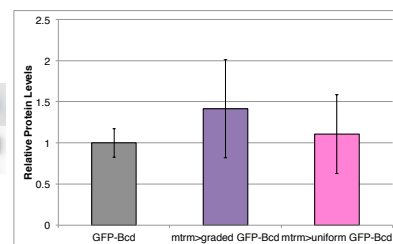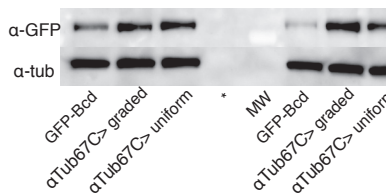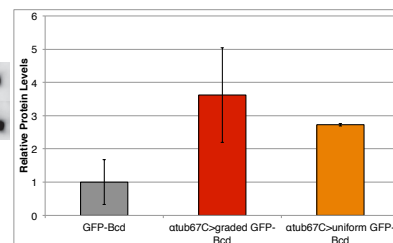

Supplement: supp [file elife-28275-supp-v1.zip]
